# Supplementary material for: Use of Half-Generation PAMAM Dendrimers (G0.5–G3.5) with Carboxylate End-Groups to Improve the DACHPtCl2 and 5-FU Efficacy as Anticancer Drugs
Source: MDPI journal article supplement (doi:10.3390/molecules26102924), 2021-05-14
Supplement: s1 [file s1]

# Supplementary Materials

## Use of half-generation PAMAM dendrimers (G0.5-G3.5) with carboxylate end-groups to improve the DACHPtCl<sub>2</sub> and 5-FU efficacy as anticancer drugs<sup>†</sup>

Cláudia Camacho <sup>1</sup>, Helena Tomás <sup>1</sup> and João Rodrigues <sup>1,2,\*</sup>

<sup>1</sup> CQM-Centro de Química da Madeira, MMRG, Universidade da Madeira, Campus da Penteada, 9000-390 Funchal, Portugal;

<sup>2</sup> School of Materials Science and Engineering, Center for Nano Energy Materials, Northwestern Polytechnical University, Xi'an 710072, China

<sup>†</sup> Dedicated to Prof. J.-P. Majoral on his 80<sup>th</sup> Birthday.

### Figure Index

|                                                                                                                                                                                                                                                                       |    |
|-----------------------------------------------------------------------------------------------------------------------------------------------------------------------------------------------------------------------------------------------------------------------|----|
| <b>Figure S1:</b> <sup>1</sup> H-NMR spectrum of DACHPtCl <sub>2</sub> performed in D <sub>2</sub> O.....                                                                                                                                                             | 4  |
| <b>Figure S2:</b> FTIR spectra of DACHPtCl <sub>2</sub> in KBr pellet.....                                                                                                                                                                                            | 4  |
| <b>Figure S3:</b> a) Absorption spectra of DACHPtCl <sub>2</sub> recorded at a concentration of 40 μM of in ultrapure water and b) Emission (λ <sub>ex</sub> = 380nm) spectra of DACHPtCl <sub>2</sub> recorded at a concentration of 500 μM in ultrapure water. .... | 5  |
| <b>Figure S4:</b> <sup>1</sup> H-NMR spectrum of bis-aquated DACHPt done in D <sub>2</sub> O.....                                                                                                                                                                     | 5  |
| <b>Figure S5:</b> <sup>13</sup> C-NMR spectrum of bis-aquated DACHPt done in D <sub>2</sub> O.....                                                                                                                                                                    | 5  |
| <b>Figure S6:</b> TOF-MS (MALDI) mass spectrum of G0.5COO(DACHPt) <sub>4</sub> metallodendrimer.....                                                                                                                                                                  | 7  |
| <b>Figure S7:</b> TOF-MS (ESI +) mass spectrum of G1.5COO(DACHPt) <sub>8</sub> metallodendrimer.....                                                                                                                                                                  | 8  |
| <b>Figure S8:</b> TOF-MS (ESI +) mass spectrum of G2.5COO(DACHPt) <sub>16</sub> metallodendrimer.....                                                                                                                                                                 | 8  |
| <b>Figure S9:</b> TOF-MS (MALDI) mass spectrum of G3.5COO(DACHPt) <sub>32</sub> metallodendrimer.....                                                                                                                                                                 | 9  |
| <b>Figure S10:</b> <sup>195</sup> Pt-NMR spectrum of G0.5COO(DACHPt) <sub>4</sub> performed in D <sub>2</sub> O, with K <sub>2</sub> PtCl <sub>4</sub> as external reference (-1631 ppm). ....                                                                        | 9  |
| <b>Figure S11:</b> <sup>1</sup> H-NMR spectrum of G1.5COO(DACHPt) <sub>8</sub> performed in D <sub>2</sub> O. ....                                                                                                                                                    | 10 |
| <b>Figure S12:</b> <sup>13</sup> C-NMR spectrum of G1.5COO(DACHPt) <sub>8</sub> performed in D <sub>2</sub> O. ....                                                                                                                                                   | 10 |

|                                                                                                                                                                                                                                                                                                                                                                                                                                         |    |
|-----------------------------------------------------------------------------------------------------------------------------------------------------------------------------------------------------------------------------------------------------------------------------------------------------------------------------------------------------------------------------------------------------------------------------------------|----|
| <b>Figure S13:</b> $^{195}\text{Pt}$ -NMR spectrum of $\text{G1.5COO(DACHPt)}_8$ performed in $\text{D}_2\text{O}$ , with $\text{K}_2\text{PtCl}_4$ as external reference (-1631 ppm). The other signals at -1467 ppm probably corresponds to $\text{trans-[Pt(cyclopentylamine)}_2(\text{D}_2\text{O})_2](\text{NO}_3)_2$ [1].                                                                                                         | 11 |
| <b>Figure S14:</b> $^1\text{H}$ -NMR spectrum of $\text{G2.5COO(DACHPt)}_{16}$ performed in $\text{D}_2\text{O}$ .                                                                                                                                                                                                                                                                                                                      | 11 |
| <b>Figure S15:</b> $^{13}\text{C}$ -NMR spectrum of $\text{G2.5COO(DACHPt)}_{16}$ performed in $\text{D}_2\text{O}$ .                                                                                                                                                                                                                                                                                                                   | 12 |
| <b>Figure S16:</b> $^{195}\text{Pt}$ -NMR spectrum of $\text{G2.5COO(DACHPt)}_{16}$ performed in $\text{D}_2\text{O}$ , with $\text{K}_2\text{PtCl}_4$ as external reference (-1631 ppm).                                                                                                                                                                                                                                               | 12 |
| <b>Figure S17:</b> $^1\text{H}$ -NMR spectrum of $\text{G3.5COO(DACHPt)}_{32}$ performed in $\text{D}_2\text{O}$ .                                                                                                                                                                                                                                                                                                                      | 13 |
| <b>Figure S18:</b> $^{13}\text{C}$ -NMR spectrum of $\text{G3.5COO(DACHPt)}_{32}$ performed in $\text{D}_2\text{O}$ .                                                                                                                                                                                                                                                                                                                   | 13 |
| <b>Figure S19:</b> $^{195}\text{Pt}$ -NMR spectrum of $\text{G3.5COO(DACHPt)}_{32}$ performed in $\text{D}_2\text{O}$ , with $\text{K}_2\text{PtCl}_4$ as external reference (-1631 ppm).                                                                                                                                                                                                                                               | 14 |
| <b>Figure S20:</b> FTIR spectra of different generations of anionic PAMAM dendrimers (G0.5-G3.5) in KBr pellet.                                                                                                                                                                                                                                                                                                                         | 14 |
| <b>Figure S21:</b> FTIR spectra of DACHPt-metallodendrimers in KBr pellet.                                                                                                                                                                                                                                                                                                                                                              | 15 |
| <b>Figure S22:</b> UV-Vis spectra of anionic PAMAM dendrimers at a concentration of 500 $\mu\text{M}$ in ultrapure water.                                                                                                                                                                                                                                                                                                               | 15 |
| <b>Figure S23:</b> Emission ( $\lambda_{\text{ex}} = 380\text{nm}$ ) of anionic PAMAM dendrimers at a concentration of 500 $\mu\text{M}$ in ultrapure water.                                                                                                                                                                                                                                                                            | 16 |
| <b>Figure S24:</b> Representative UV-visible spectra of $\text{DACHPtCl}_2$ with increasing concentration of CT-DNA (0, 6.25, 12.5, 18.75, 25, 31.25, 37.5, 43.75 and 50 $\mu\text{M}$ ) in 5 mM Tris-HCl/50 mM NaCl at pH 7.4. The inset corresponds to the plot of $A_0/(A-A_0)$ versus $1/[\text{DNA}]$ , which is used to determine the binding constant. The arrow indicates the direction of increasing the concentration of DNA. | 16 |
| <b>Figure S25:</b> Representative UV-visible spectra of oxaliplatin with increasing concentration of CT-DNA (0, 6.25, 12.5, 18.75, 25, 31.25, 37.5, 43.75 and 50 $\mu\text{M}$ ) in 5 mM Tris-HCl/50 mM NaCl at pH 7.4. The inset corresponds to the plot of $A_0/(A-A_0)$ versus $1/[\text{DNA}]$ , which is used to determine the binding constant. The arrow indicates the direction of increasing the concentration of DNA.         | 17 |
| <b>Figure S26:</b> FTIR spectra of $\text{G2.5COO(DACHPt)}_{16}/5\text{-FU}$ in KBr pellet.                                                                                                                                                                                                                                                                                                                                             | 17 |
| <b>Figure S27:</b> FTIR spectra of $\text{G2.5(COONa)}_{32}/5\text{-FU}$ in KBr pellet.                                                                                                                                                                                                                                                                                                                                                 | 18 |
| <b>Figure S28:</b> $^1\text{H}$ -NMR of $\text{G2.5COO(DACHPt)}_{16}$ , $\text{G2.5COO(DACHPt)}_{16}/5\text{-FU}$ and 5-FU in $\text{D}_2\text{O}$ .                                                                                                                                                                                                                                                                                    | 18 |

|                                                                                                                                                                                                                         |    |
|-------------------------------------------------------------------------------------------------------------------------------------------------------------------------------------------------------------------------|----|
| <b>Figure S29:</b> $^{13}\text{C}$ -NMR of $\text{G2.5COO}(\text{DACHPt})_{16}$ , $\text{G2.5COO}(\text{DACHPt})_{16}/5\text{-FU}$ and $5\text{-FU}$ in $\text{D}_2\text{O}$ . .....                                    | 19 |
| <b>Figure S30:</b> $^{19}\text{F}$ -NMR of $\text{G2.5COO}(\text{DACHPt})_{16}/5\text{-FU}$ and $5\text{-FU}$ in $\text{D}_2\text{O}$ . .....                                                                           | 20 |
| <b>Figure S31:</b> $^1\text{H}$ -NMR of $\text{G2.5}(\text{COONa})_{32}$ , $\text{G2.5}(\text{COONa})_{32}/5\text{-FU}$ and $5\text{-FU}$ in $\text{D}_2\text{O}$ . .....                                               | 21 |
| <b>Figure S32:</b> $^{13}\text{C}$ -NMR of $\text{G2.5}(\text{COONa})_{32}$ , $\text{G2.5}(\text{COONa})_{32}/5\text{-FU}$ and $5\text{-FU}$ in $\text{D}_2\text{O}$ . .....                                            | 22 |
| <b>Figure S33:</b> $^{19}\text{F}$ -NMR of $\text{G2.5}(\text{COONa})_{32}/5\text{-FU}$ and $5\text{-FU}$ in $\text{D}_2\text{O}$ . .....                                                                               | 23 |
| <b>Figure S34:</b> Standard curve of Hg using several dilutions: 0.2; 0.37; 0.54; 0.71; 0.88; 1.05; 1.22 and 1.39mg/mL. The absorbance was measured at 550nm. ....                                                      | 25 |
| <b>Figure S35:</b> Standard curve of 5-Fluorouracil in ultrapure water using different concentrations: 0.25, 0.5, 0.75, 1, 2.5, 5, 7.5, 10, 15, 20 and 25 $\mu\text{g/mL}$ . The absorbance was measured at 266nm. .... | 26 |
| <b>Figure S36:</b> Standard curve of 5-Fluorouracil in PBS 5 using different concentrations: 0.25, 0.5, 0.75, 1, 2.5, 5, 7.5, 10, 15, 20 and 25 $\mu\text{g/mL}$ . The absorbance was measured at 266nm. ....           | 26 |
| <b>Figure S37:</b> Standard curve of 5-Fluorouracil in PBS 7.4 using different concentrations: 0.25, 0.5, 0.75, 1, 2.5, 5, 7.5, 10, 15, 20 and 25 $\mu\text{g/mL}$ . The absorbance was measured at 266nm. ....         | 27 |
| <br><b>Table Index</b>                                                                                                                                                                                                  |    |
| Table S1: Molecular weight of the DACHPt metallodendrimers. ....                                                                                                                                                        | 6  |
| <br><b>Scheme Index</b>                                                                                                                                                                                                 |    |
| <b>Scheme S1:</b> Synthesis of $\text{DACHPtCl}_2$ compound. ....                                                                                                                                                       | 23 |
| <b>Scheme S2:</b> Synthesis of $\text{DACHPt}(\text{H}_2\text{O})_2$ compound. ....                                                                                                                                     | 24 |
| <b>Scheme S3:</b> Representation of the synthesis of anionic PAMAM dendrimer $\text{G0.5}$ with $\text{DACHPt}(\text{H}_2\text{O})_2$ complex, $\text{G0.5COO}(\text{DACHPt})_4$ . ....                                 | 24 |
| <b>Scheme S4:</b> Representation of the synthesis of anionic PAMAM dendrimer $\text{G1.5}$ with $\text{DACHPt}(\text{H}_2\text{O})_2$ complex, $\text{G1.5COO}(\text{DACHPt})_8$ . ....                                 | 24 |
| <b>Scheme S5:</b> Representation of the synthesis of anionic PAMAM dendrimer $\text{G2.5}$ with $\text{DACHPt}(\text{H}_2\text{O})_2$ complex, $\text{G2.5COO}(\text{DACHPt})_{16}$ . ....                              | 25 |
| <b>Scheme S6:</b> Representation of the synthesis of anionic PAMAM dendrimer $\text{G2.5}$ with $\text{DACHPt}(\text{H}_2\text{O})_2$ complex, $\text{G3.5COO}(\text{DACHPt})_{32}$ . ....                              | 25 |

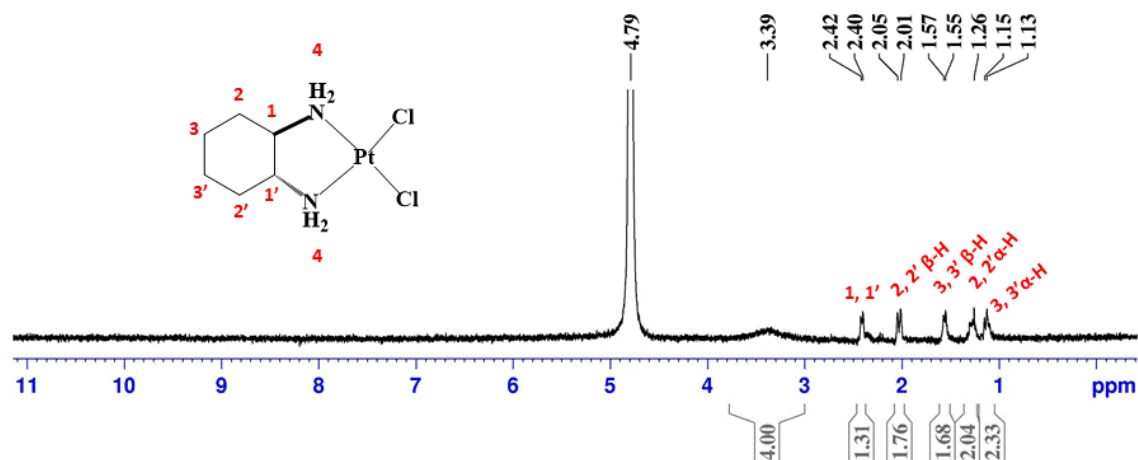

**Figure S1:** <sup>1</sup>H-NMR spectrum of DACHPtCl<sub>2</sub> performed in D<sub>2</sub>O.

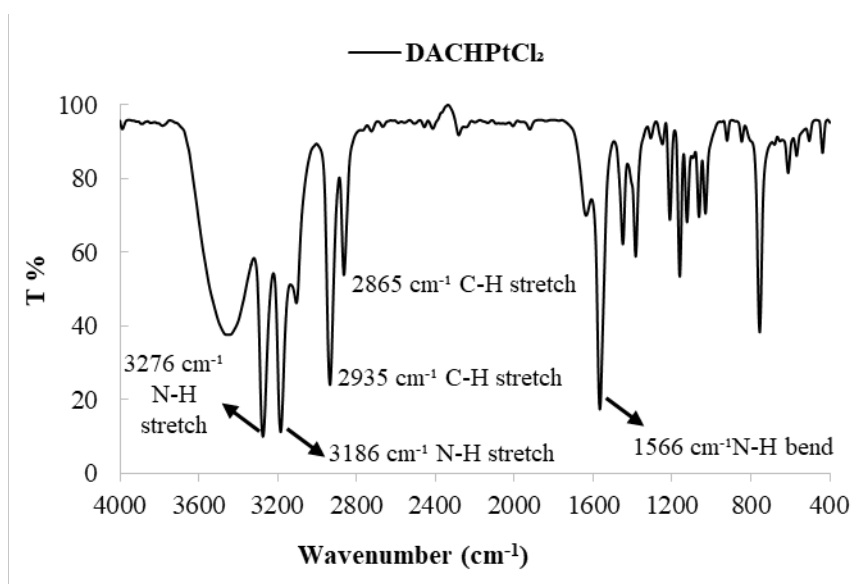

**Figure S2:** FTIR spectra of DACHPtCl<sub>2</sub> in KBr pellet.

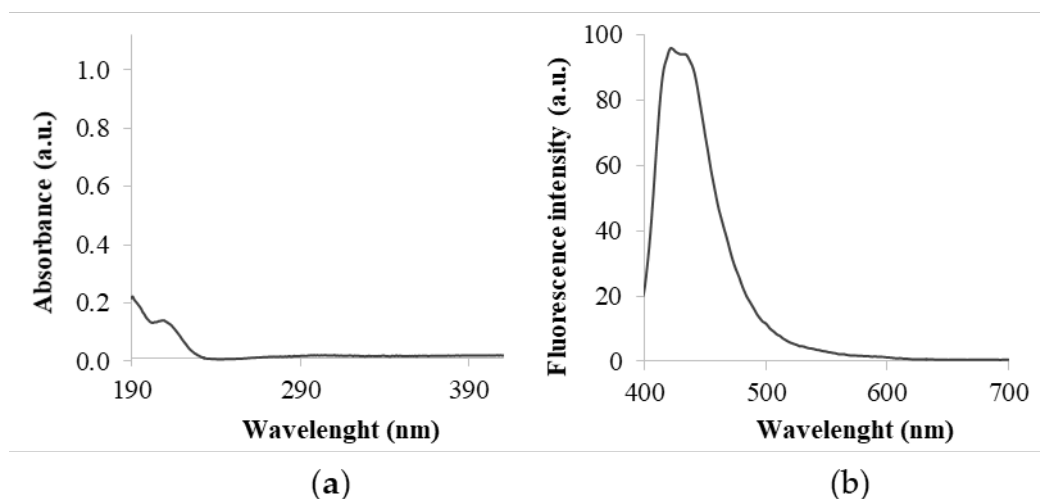

**Figure S3:** a) Absorption spectra of DACHPtCl<sub>2</sub> recorded at a concentration of 40 μM in ultrapure water and b) Emission ( $\lambda_{\text{ex}} = 380\text{nm}$ ) spectra of DACHPtCl<sub>2</sub> recorded at a concentration of 500 μM in ultrapure water.

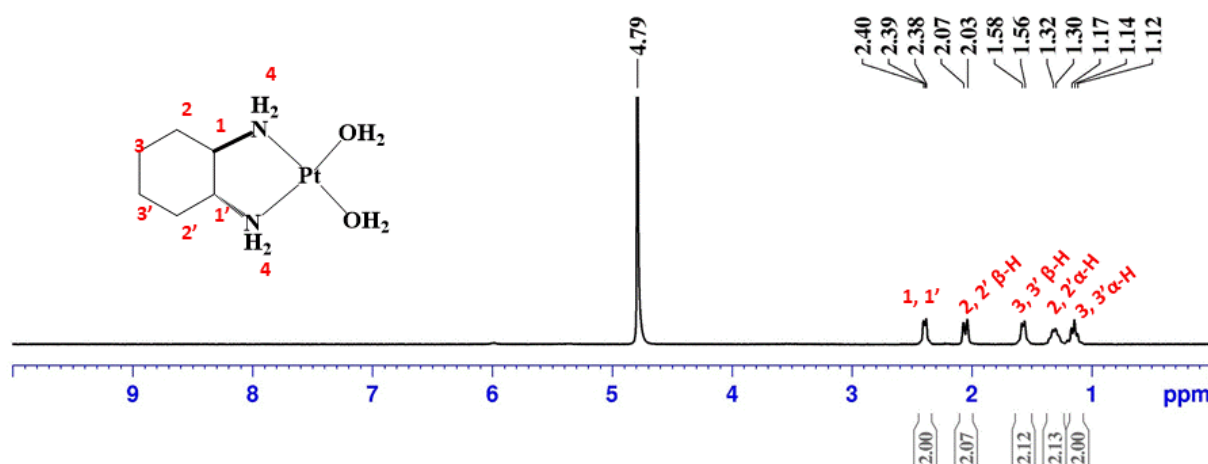

**Figure S4:** <sup>1</sup>H-NMR spectrum of bis-aquated DACHPt done in D<sub>2</sub>O.

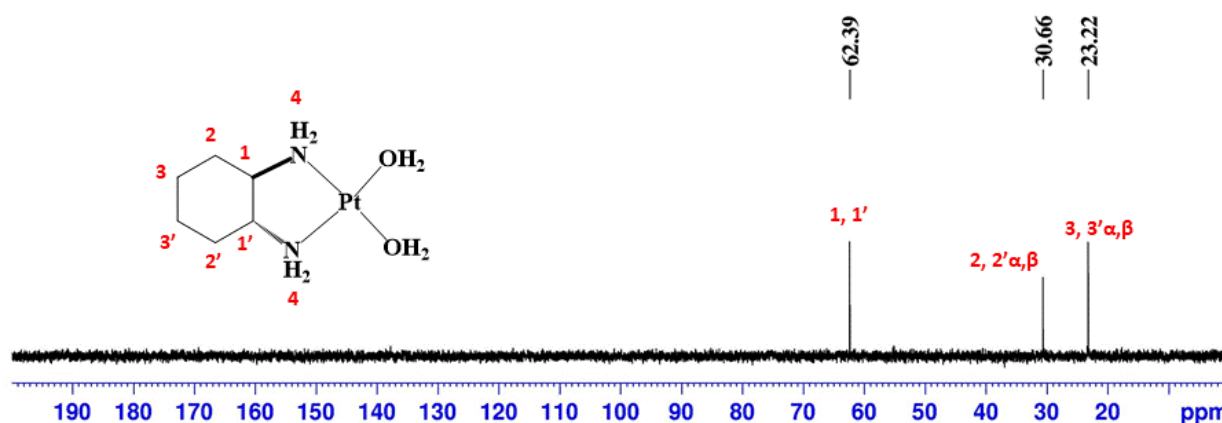

**Figure S5:** <sup>13</sup>C-NMR spectrum of bis-aquated DACHPt done in D<sub>2</sub>O.

**Table S1:** Molecular weight of the DACHPt metallodendrimers.

|                         | G0.5COO(DACHPt) <sub>4</sub>                                                                  | G1.5COO(DACHPt) <sub>8</sub>                                                                    | G2.5COO(DACHPt) <sub>16</sub>                                                                    | G3.5COO(DACHPt) <sub>32</sub>                                                         |
|-------------------------|-----------------------------------------------------------------------------------------------|-------------------------------------------------------------------------------------------------|--------------------------------------------------------------------------------------------------|---------------------------------------------------------------------------------------|
| <b>Molecular weight</b> | 2322.24                                                                                       | 5040.96                                                                                         | 10478.42                                                                                         | 21353.33                                                                              |
| <b>m/z calculated</b>   | 2014.8                                                                                        | 1008.58                                                                                         | 1558.7                                                                                           | 388.9                                                                                 |
| <b>m/z found</b>        | 2014.7<br>[M+H] <sup>+</sup>                                                                  | 1008.98<br>[M+5H] <sup>5+</sup>                                                                 | 1556.7<br>[M+H <sup>+</sup> +8MeOH] <sup>+</sup>                                                 | 388.2<br>[M]                                                                          |
|                         | C <sub>64</sub> H <sub>117</sub> N <sub>16</sub> O <sub>20</sub> Pt <sub>3</sub> <sup>+</sup> | C <sub>158</sub> H <sub>293</sub> N <sub>42</sub> O <sub>44</sub> Pt <sub>8</sub> <sup>5+</sup> | C <sub>342</sub> H <sub>641</sub> N <sub>90</sub> O <sub>100</sub> Pt <sub>16</sub> <sup>+</sup> | C <sub>632</sub> H <sub>1141</sub> N <sub>168</sub> O <sub>188</sub> Pt <sub>23</sub> |

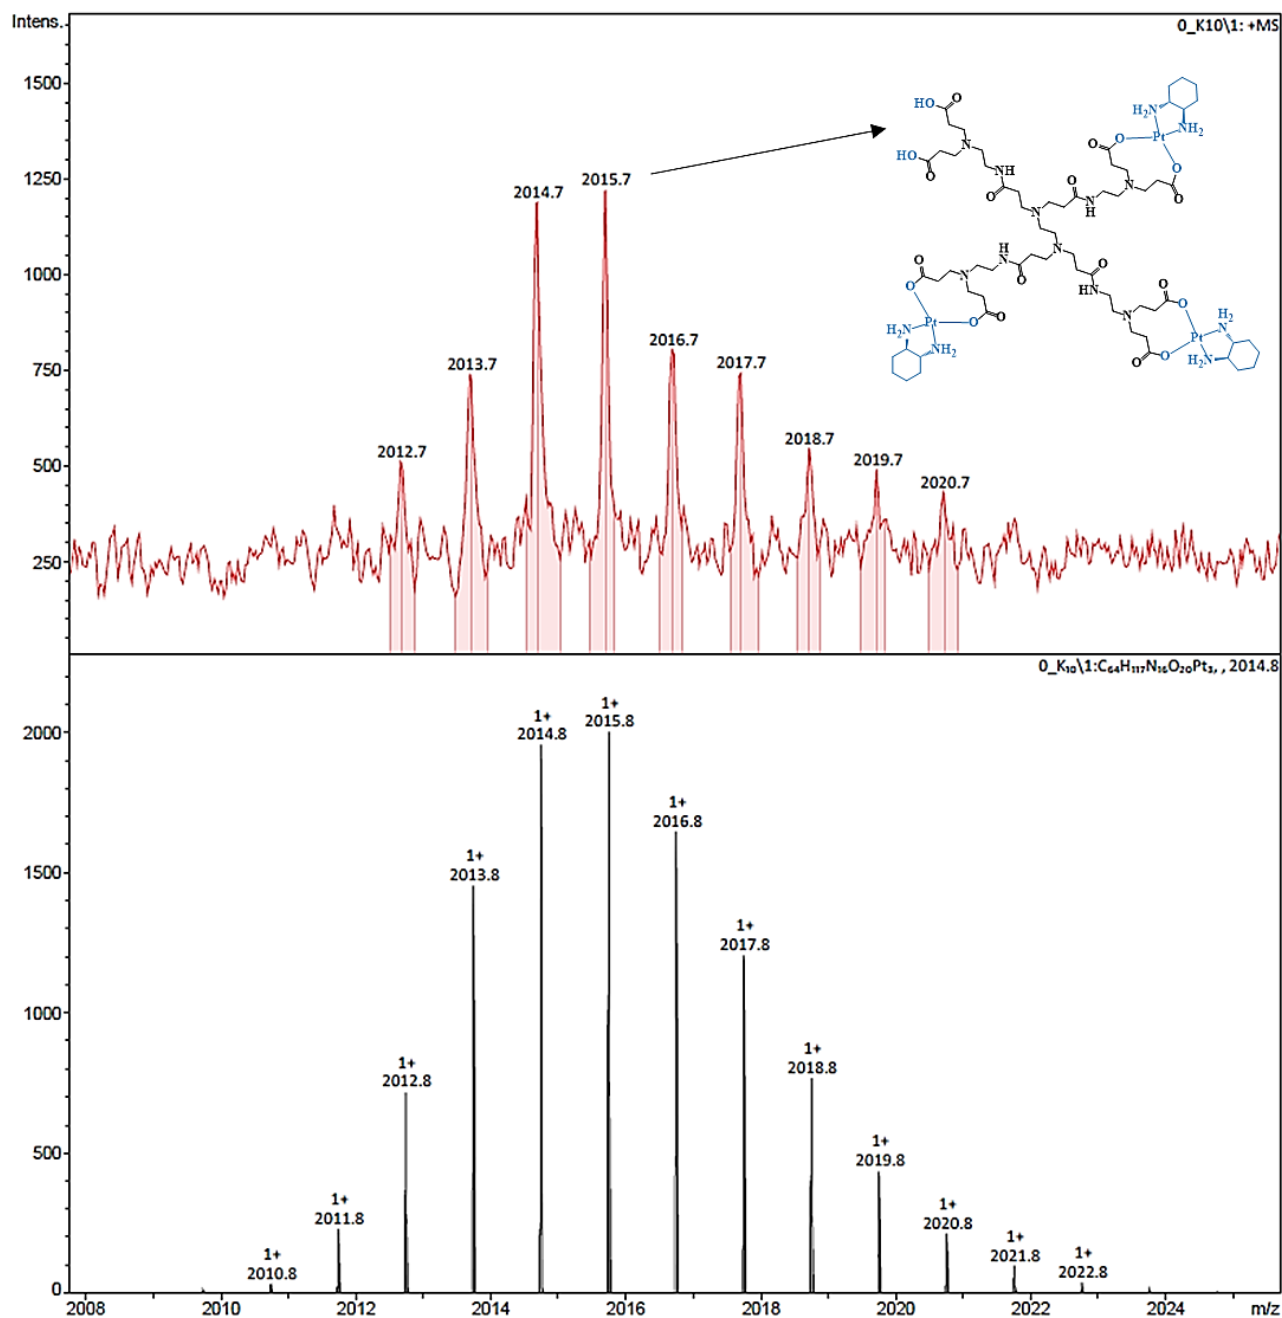

**Figure S6:** TOF-MS (MALDI) mass spectrum of G0.5COO(DACHPt)<sub>4</sub> metallodendrimer.

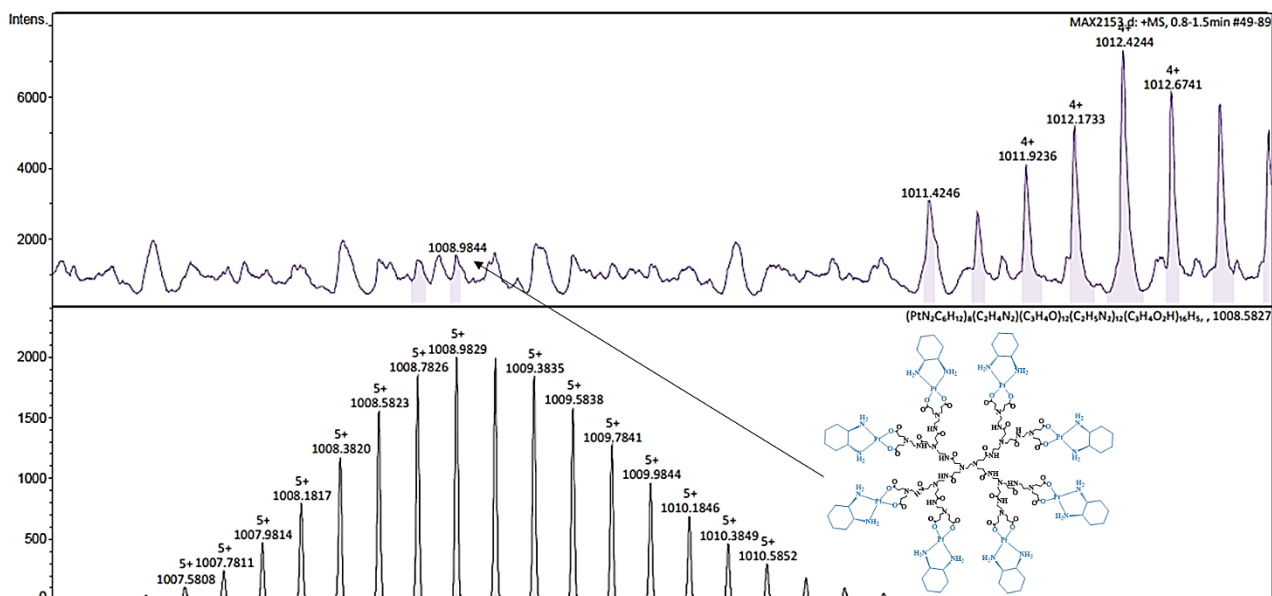

**Figure S7:** TOF-MS (ESI +) mass spectrum of G1.5COO(DACHPt)<sub>8</sub> metallodendrimer.

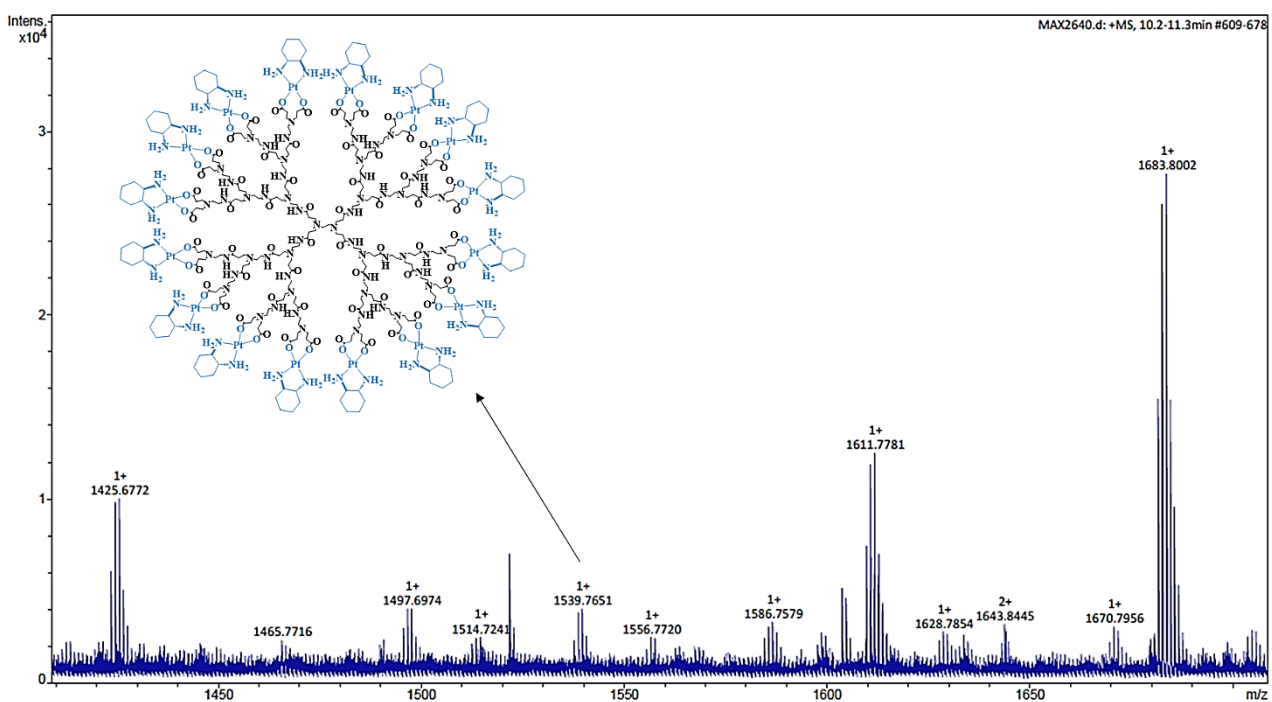

**Figure S8:** TOF-MS (ESI +) mass spectrum of G2.5COO(DACHPt)<sub>16</sub> metallodendrimer.



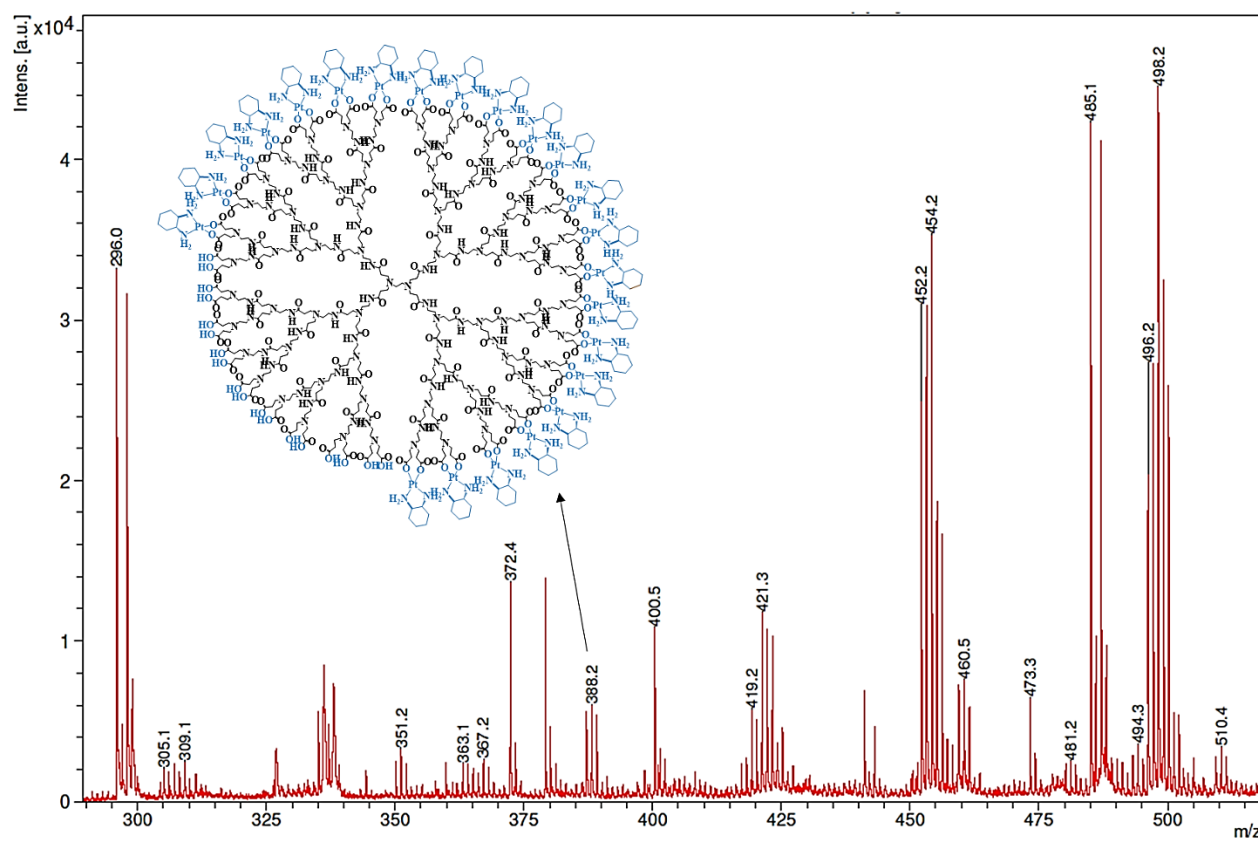

**Figure S9:** TOF-MS (MALDI) mass spectrum of G3.5COO(DACHPt)<sub>32</sub> metallodendrimer.

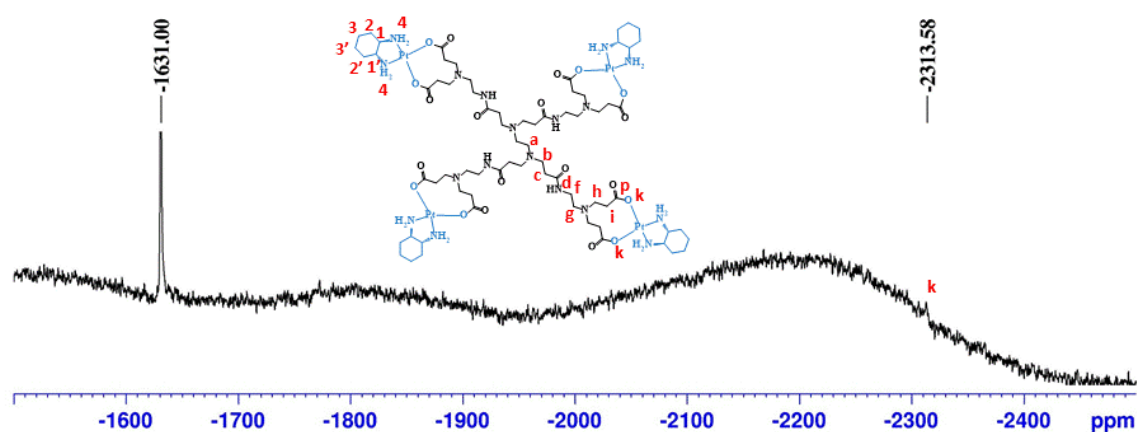

**Figure S10:** <sup>195</sup>Pt-NMR spectrum of G0.5COO(DACHPt)<sub>4</sub> performed in D<sub>2</sub>O, with K<sub>2</sub>PtCl<sub>4</sub> as external reference (-1631 ppm).

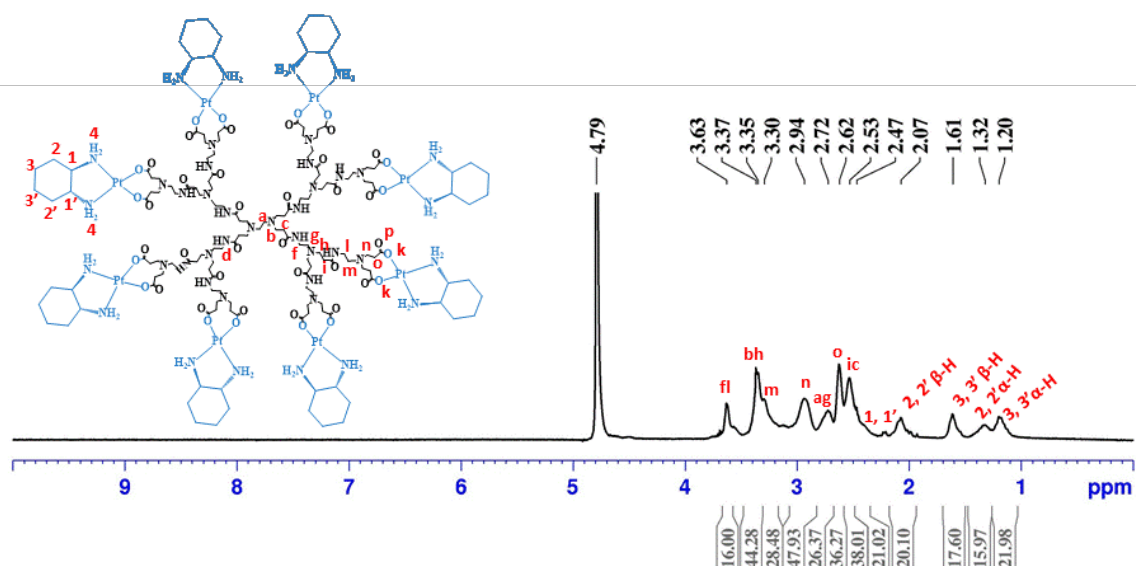

Figure S11:  $^1\text{H}$ -NMR spectrum of  $\text{G1.5COO(DACHPt)}_8$  performed in  $\text{D}_2\text{O}$ .

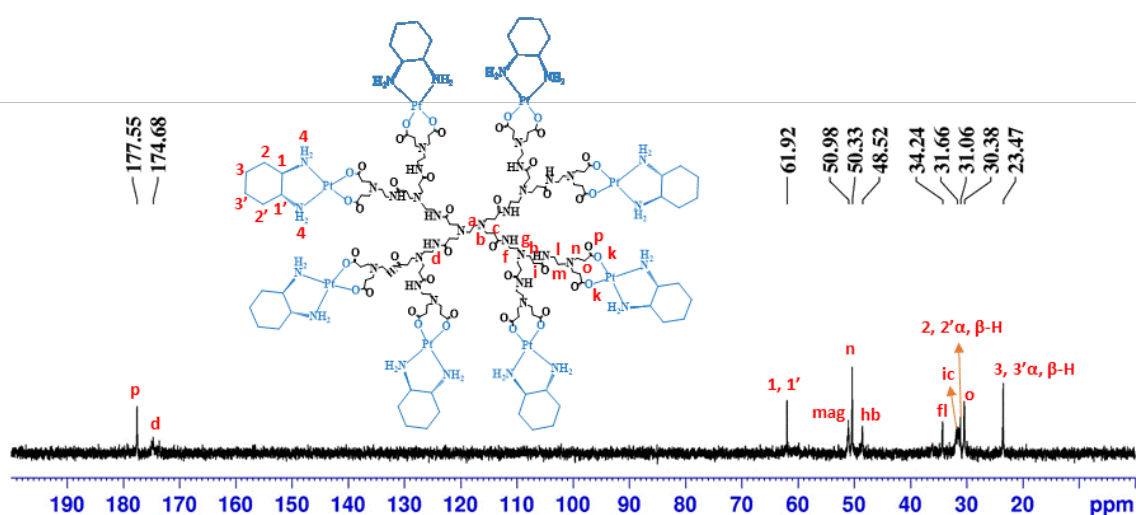

Figure S12:  $^{13}\text{C}$ -NMR spectrum of  $\text{G1.5COO(DACHPt)}_8$  performed in  $\text{D}_2\text{O}$ .

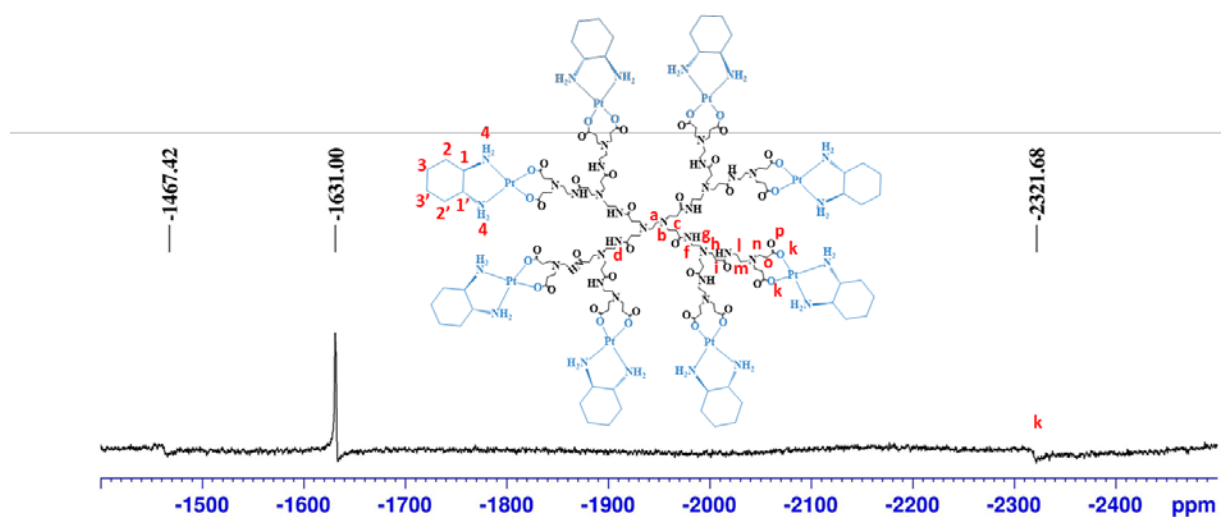

**Figure S13:**  $^{195}\text{Pt}$ -NMR spectrum of  $\text{G1.5COO(DACHPt)}_8$  performed in  $\text{D}_2\text{O}$ , with  $\text{K}_2\text{PtCl}_4$  as external reference (-1631 ppm). The other signals at -1467 ppm probably corresponds to  $\text{trans-[Pt(cyclopentylamine)}_2(\text{D}_2\text{O})_2](\text{NO}_3)_2$  [1].

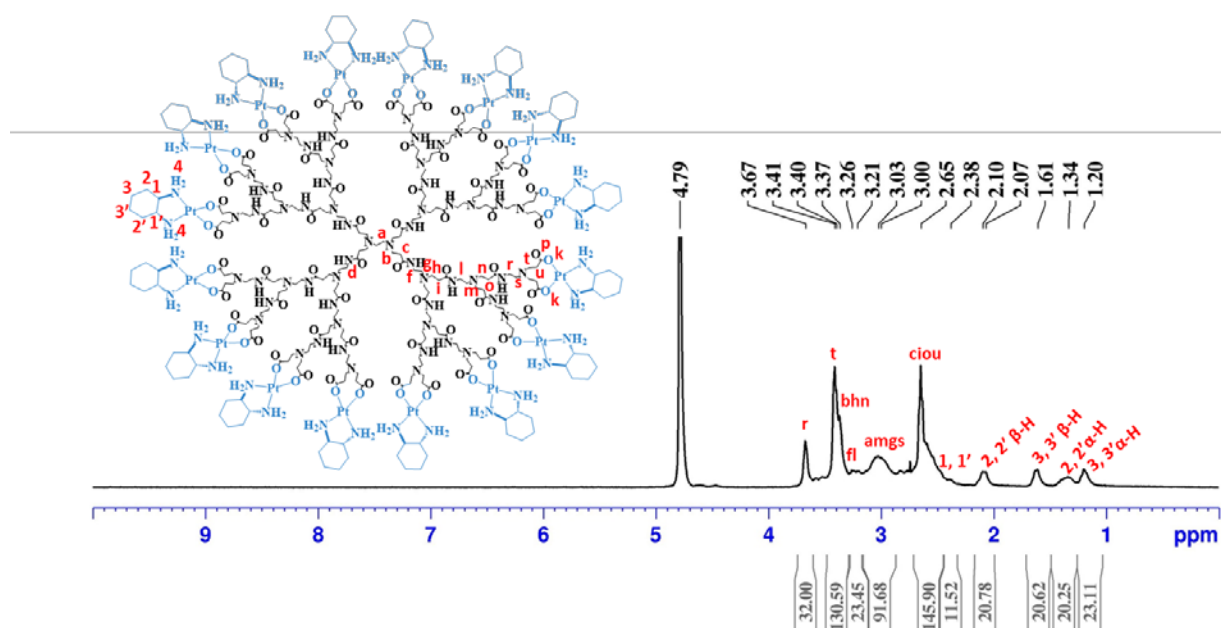

**Figure S14:**  $^1\text{H}$ -NMR spectrum of  $\text{G2.5COO(DACHPt)}_{16}$  performed in  $\text{D}_2\text{O}$ .

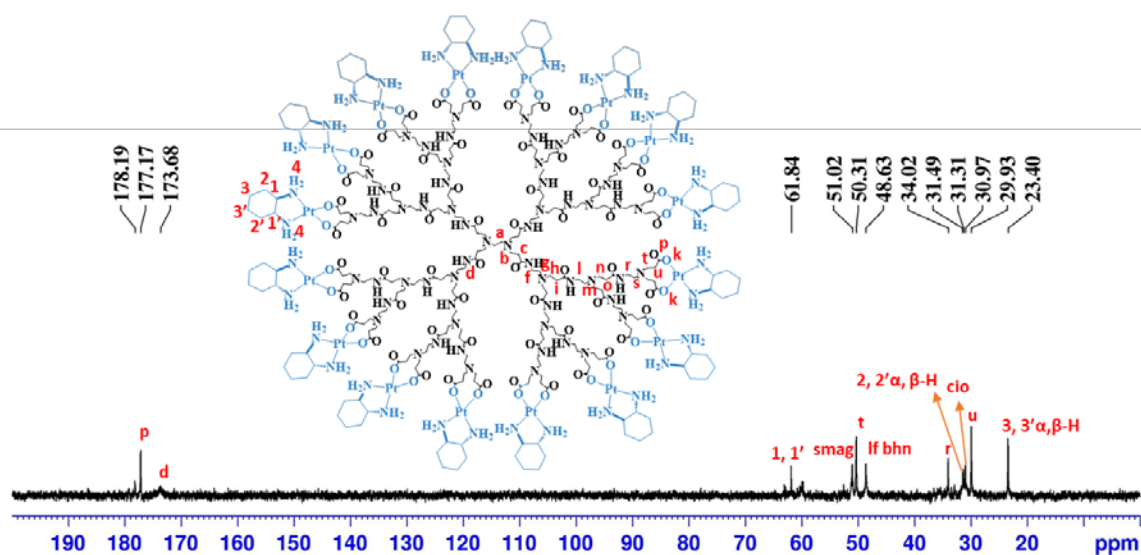

**Figure S15:**  $^{13}\text{C}$ -NMR spectrum of  $\text{G2.5COO}(\text{DACHPt})_{16}$  performed in  $\text{D}_2\text{O}$ .

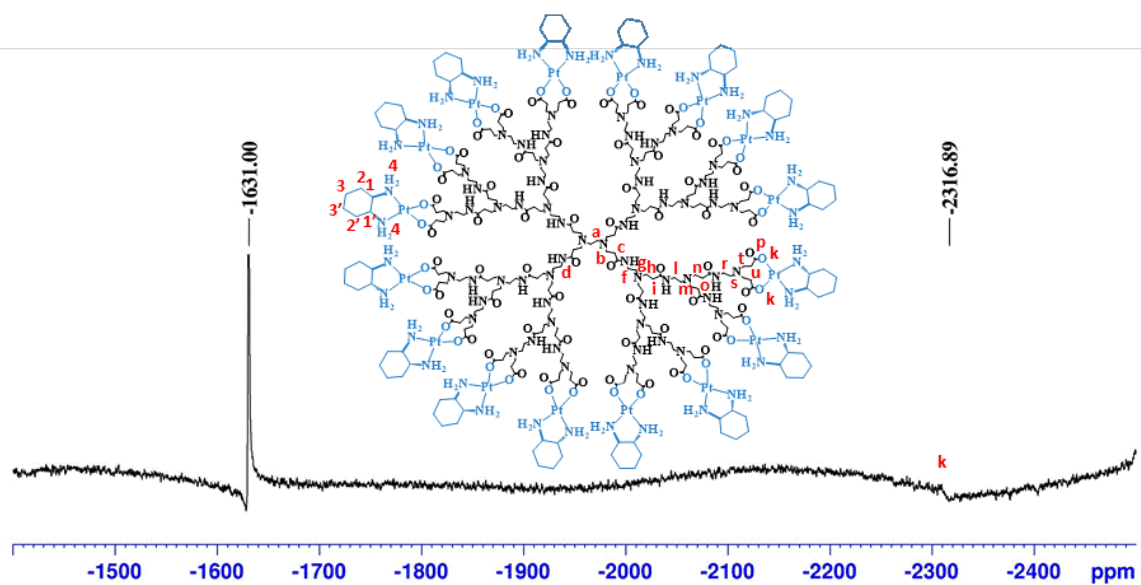

**Figure S16:**  $^{195}\text{Pt}$ -NMR spectrum of  $\text{G2.5COO}(\text{DACHPt})_{16}$  performed in  $\text{D}_2\text{O}$ , with  $\text{K}_2\text{PtCl}_4$  as external reference (-1631 ppm).

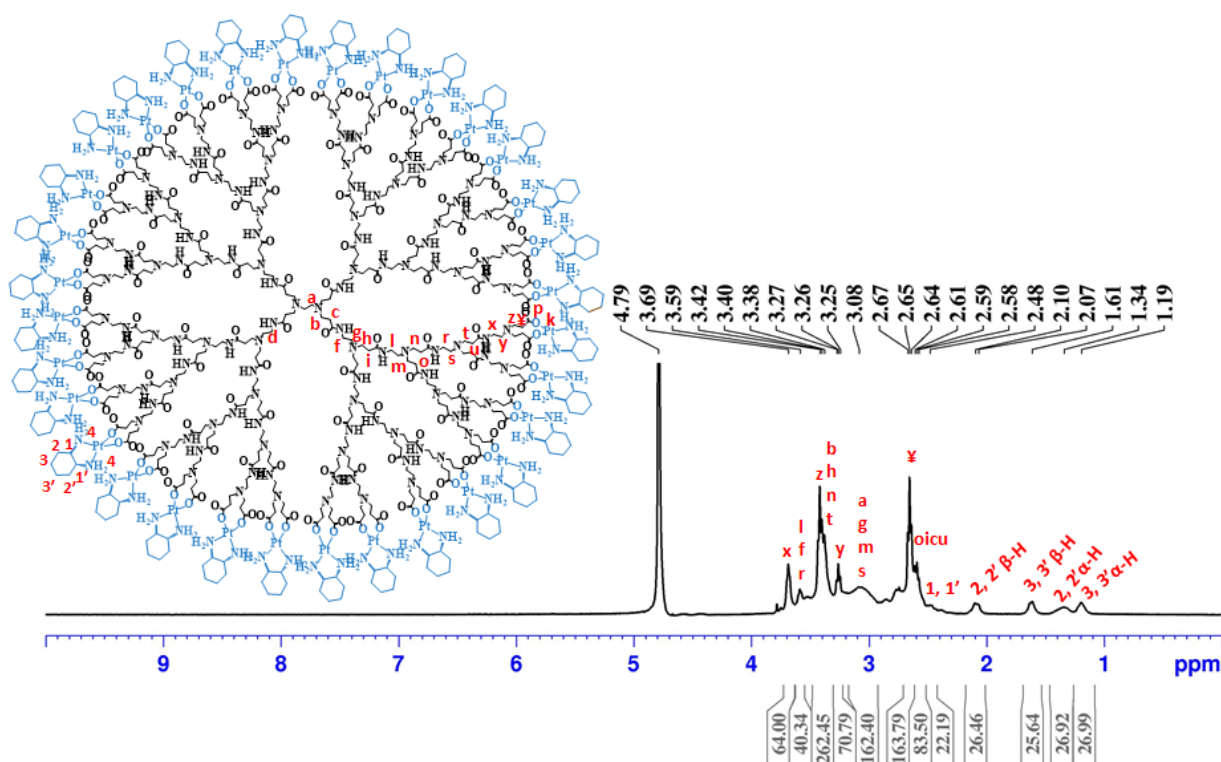

Figure S17:  $^1\text{H}$ -NMR spectrum of  $\text{G3.5COO(DACHPt)}_{32}$  performed in  $\text{D}_2\text{O}$ .

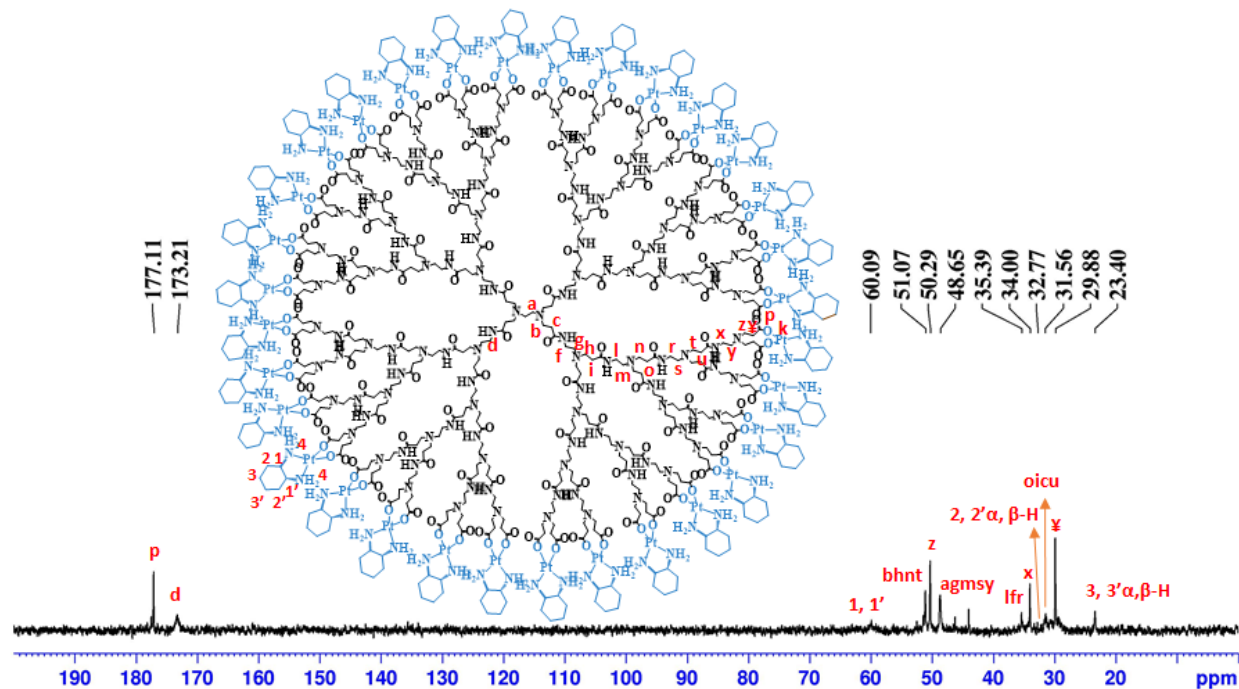

Figure S18:  $^{13}\text{C}$ -NMR spectrum of  $\text{G3.5COO(DACHPt)}_{32}$  performed in  $\text{D}_2\text{O}$ .

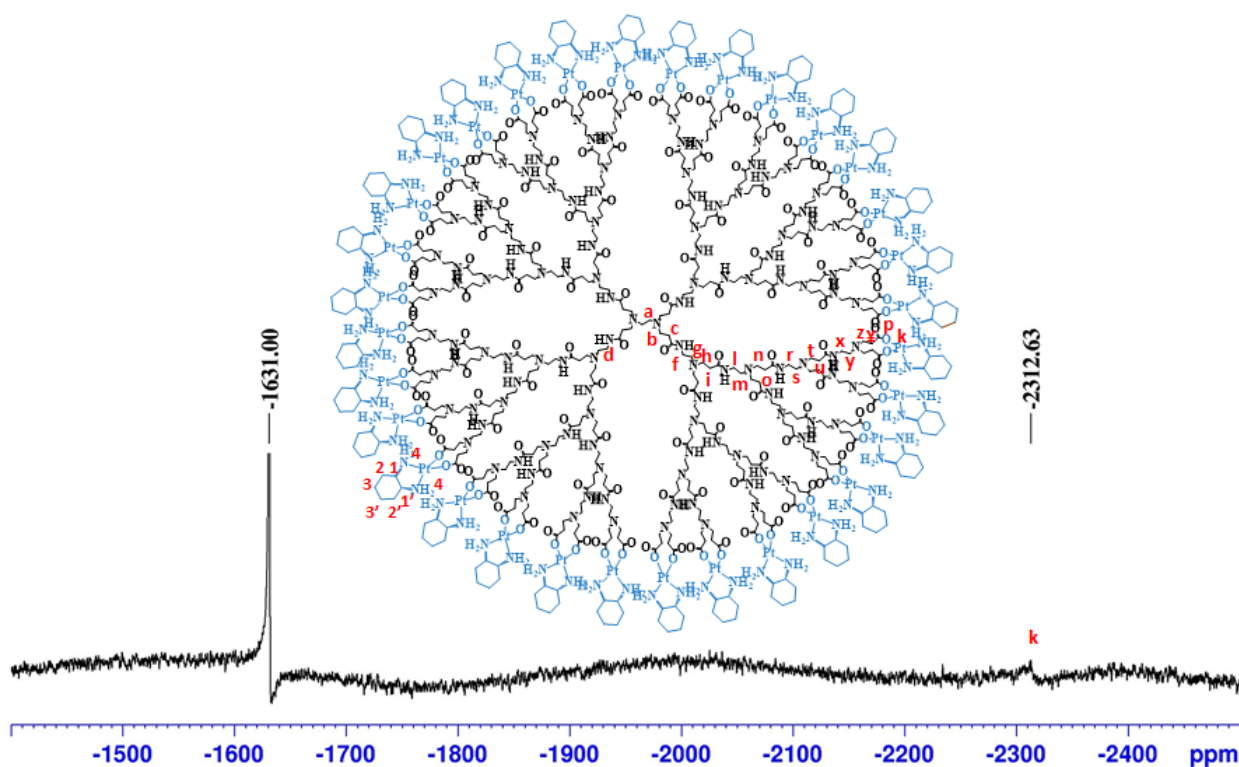

**Figure S19:**  $^{195}\text{Pt}$ -NMR spectrum of  $\text{G3.5COO(DACHPt)}_{32}$  performed in  $\text{D}_2\text{O}$ , with  $\text{K}_2\text{PtCl}_4$  as external reference (-1631 ppm).

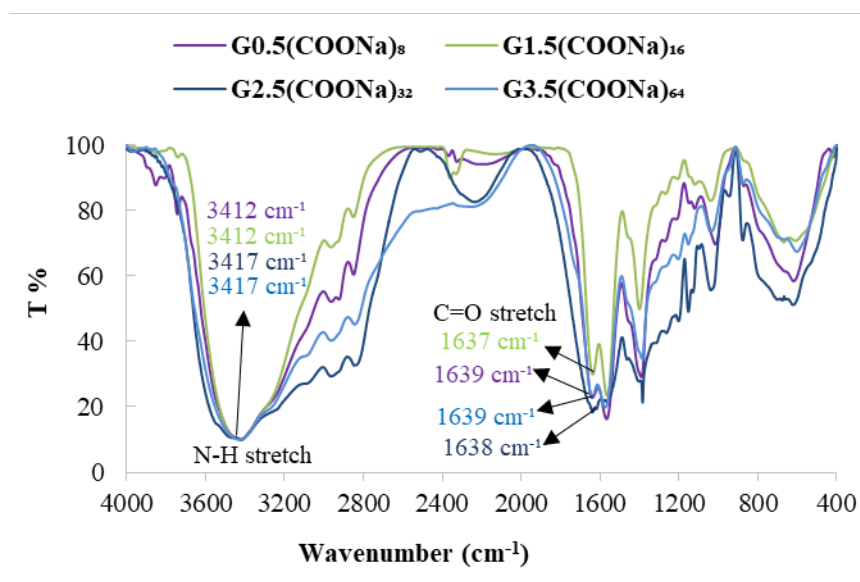

**Figure S20:** FTIR spectra of different generations of anionic PAMAM dendrimers (G0.5-G3.5) in KBr pellet.



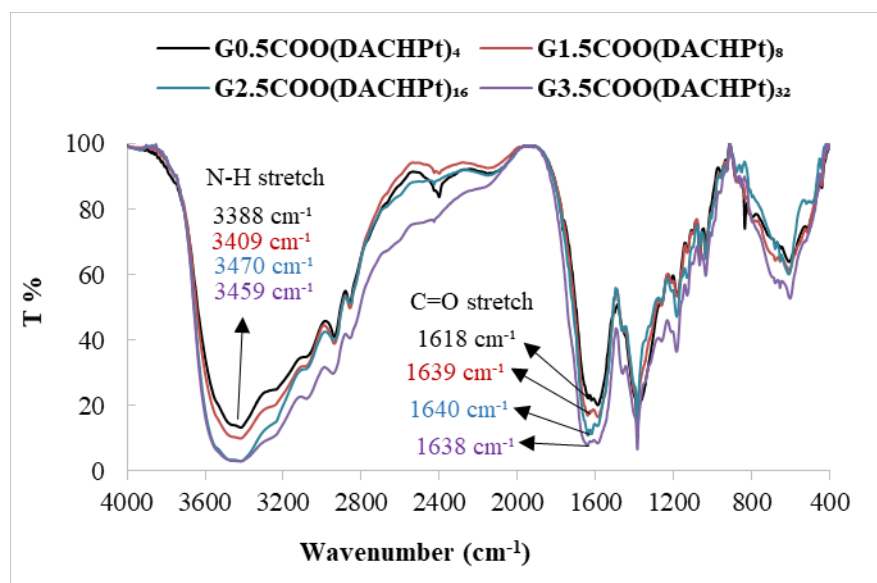

**Figure S21:** FTIR spectra of DACHPt metallodendrimers in KBr pellet.

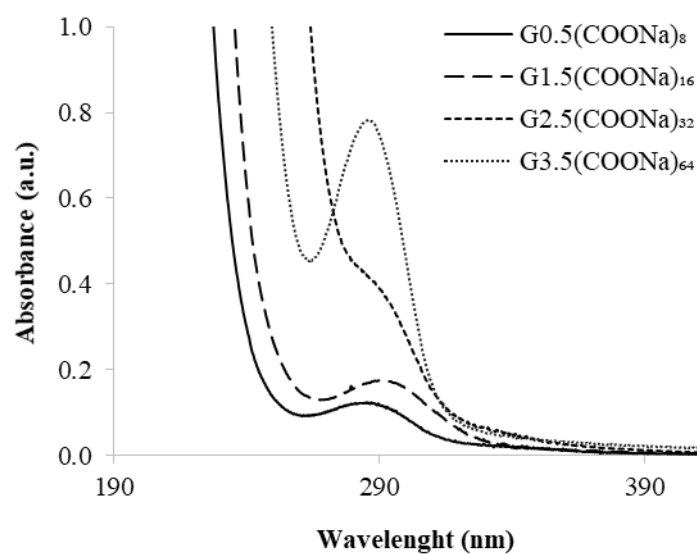

**Figure S22:** UV-Vis spectra of anionic PAMAM dendrimers at a concentration of 500  $\mu$ M in ultrapure water.

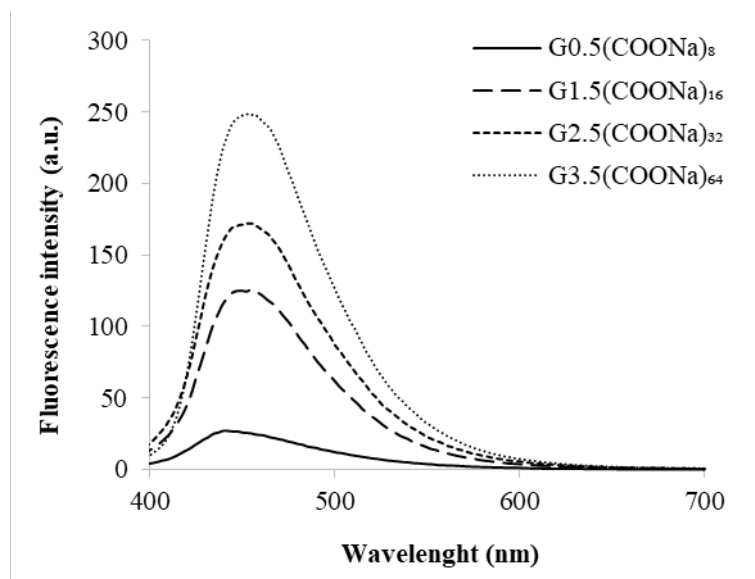

**Figure S23:** Emission ( $\lambda_{\text{ex}} = 380\text{nm}$ ) of anionic PAMAM dendrimers at a concentration of  $500\mu\text{M}$  in ultrapure water.

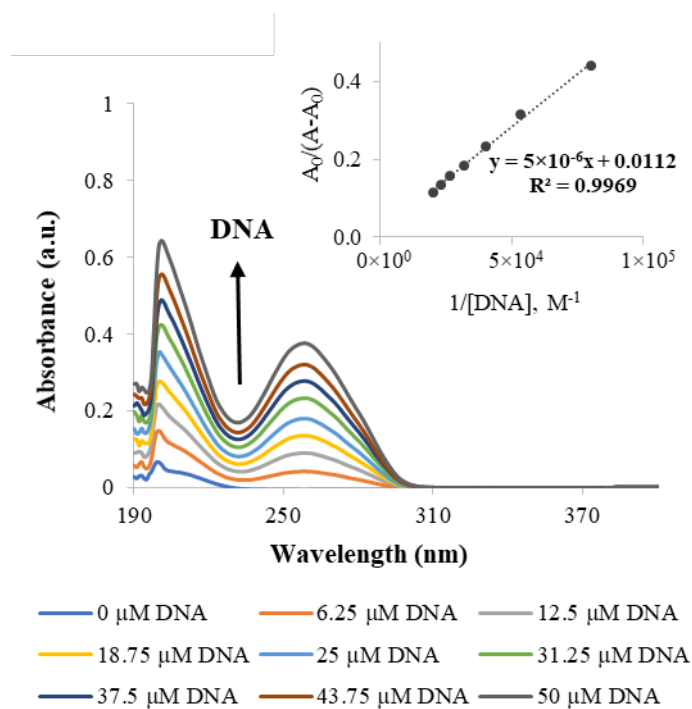

**Figure S24:** Representative UV-visible spectra of DACHPtCl<sub>2</sub> with increasing concentration of CT-DNA (0, 6.25, 12.5, 18.75, 25, 31.25, 37.5, 43.75 and  $50\mu\text{M}$ ) in 5 mM Tris-HCl/50 mM NaCl at pH 7.4. The inset corresponds to the plot of  $A_0/(A-A_0)$  versus  $1/[\text{DNA}]$ , which is used to determine the binding constant. The arrow indicates the direction of increasing the concentration of DNA.



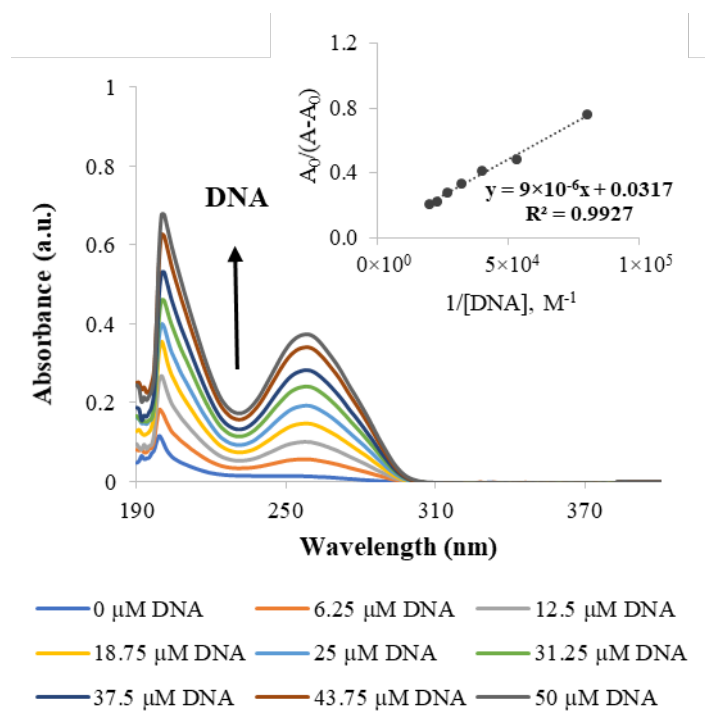

**Figure S25:** Representative UV-visible spectra of oxaliplatin with increasing concentration of CT-DNA (0, 6.25, 12.5, 18.75, 25, 31.25, 37.5, 43.75 and 50 μM) in 5 mM Tris-HCl/50 mM NaCl at pH 7.4. The inset corresponds to the plot of  $A_0/(A-A_0)$  versus  $1/[DNA]$ , which is used to determine the binding constant. The arrow indicates the direction of increasing the concentration of DNA.

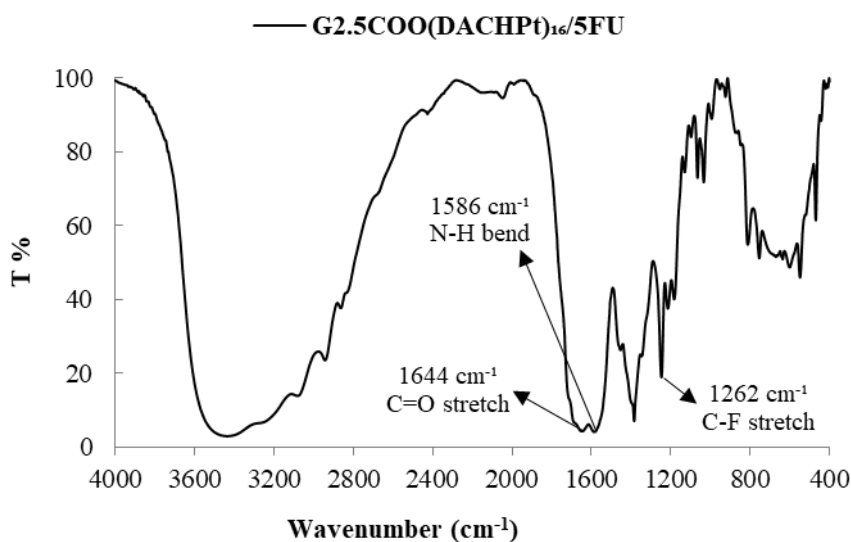

**Figure S26:** FTIR spectra of G2.5COO(DACHPt)<sub>16</sub>/5-FU in KBr pellet.

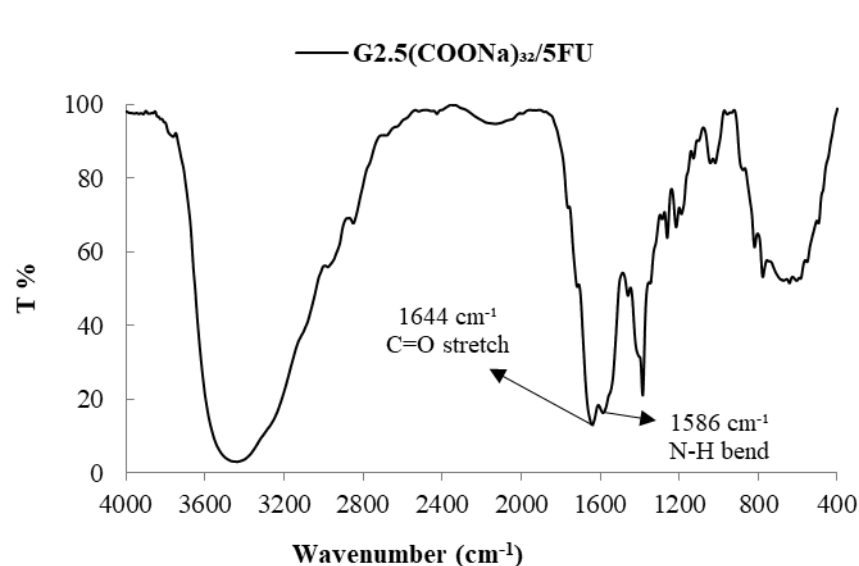

**Figure S27:** FTIR spectra of G2.5(COONa)<sub>32</sub>/5-FU in KBr pellet.

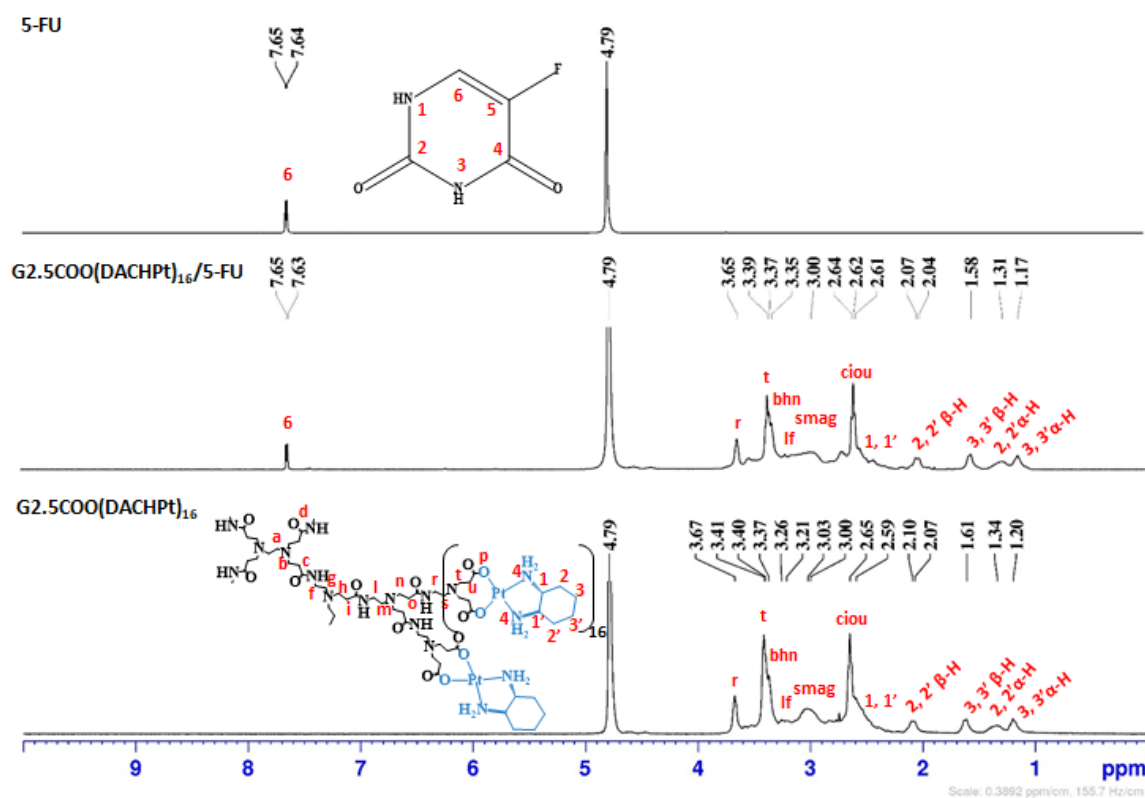

**Figure S28:** <sup>1</sup>H-NMR of G2.5COO(DACHPt)<sub>16</sub>, G2.5COO(DACHPt)<sub>16</sub>/5-FU and 5-FU in D<sub>2</sub>O.

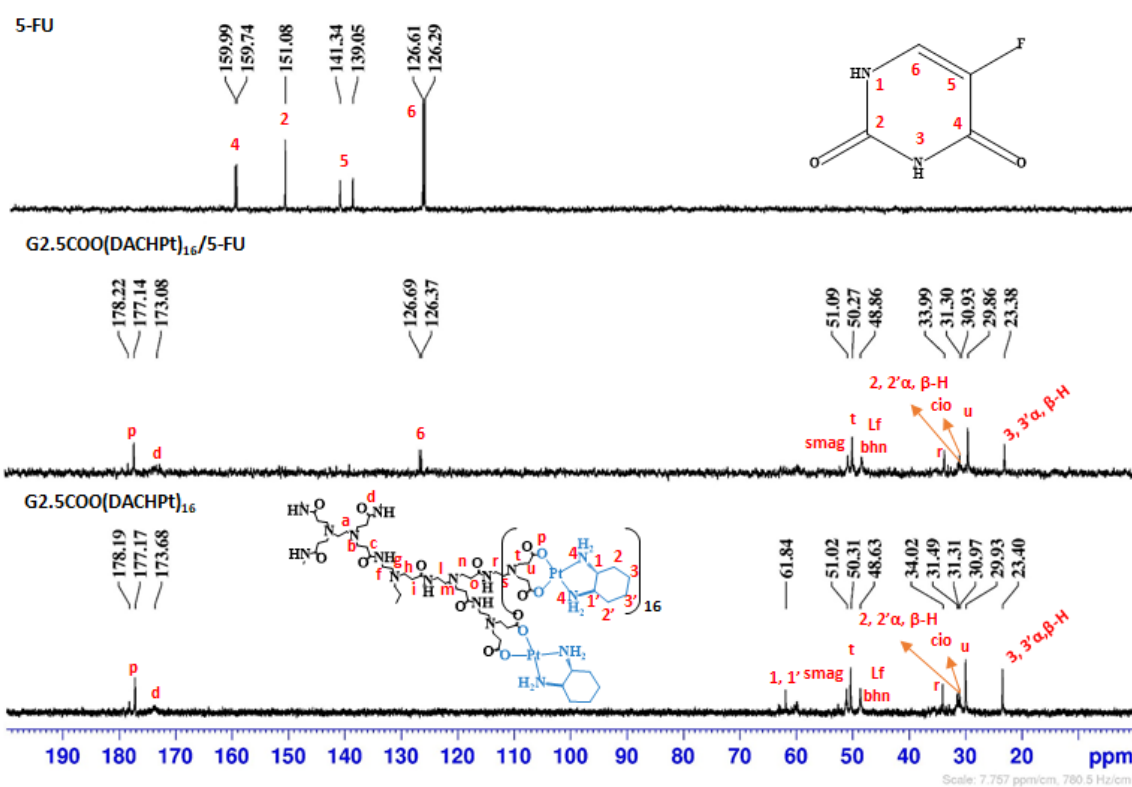

**Figure S29:**  $^{13}\text{C}$ -NMR of G2.5COO(DACHPt)<sub>16</sub>, G2.5COO(DACHPt)<sub>16</sub>/5-FU and 5-FU in D<sub>2</sub>O.

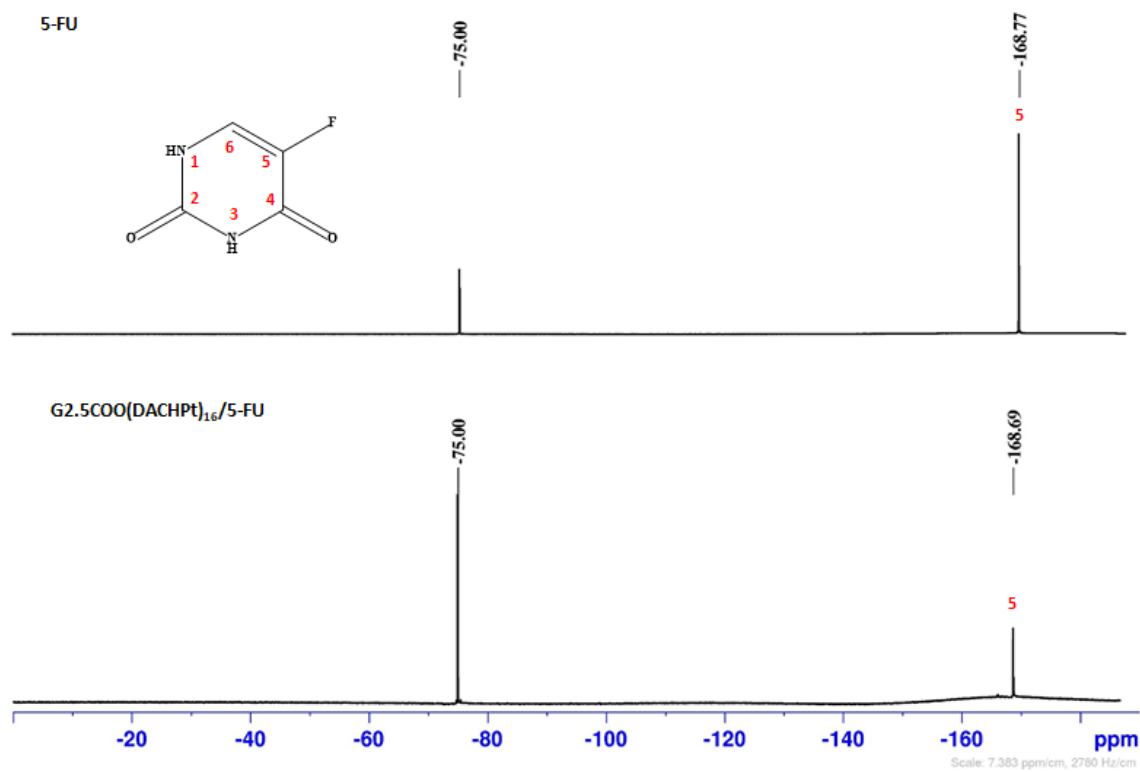

**Figure S30:**  $^{19}\text{F}$ -NMR of G2.5COO(DACHPt)<sub>16</sub>/5-FU and 5-FU in D<sub>2</sub>O.

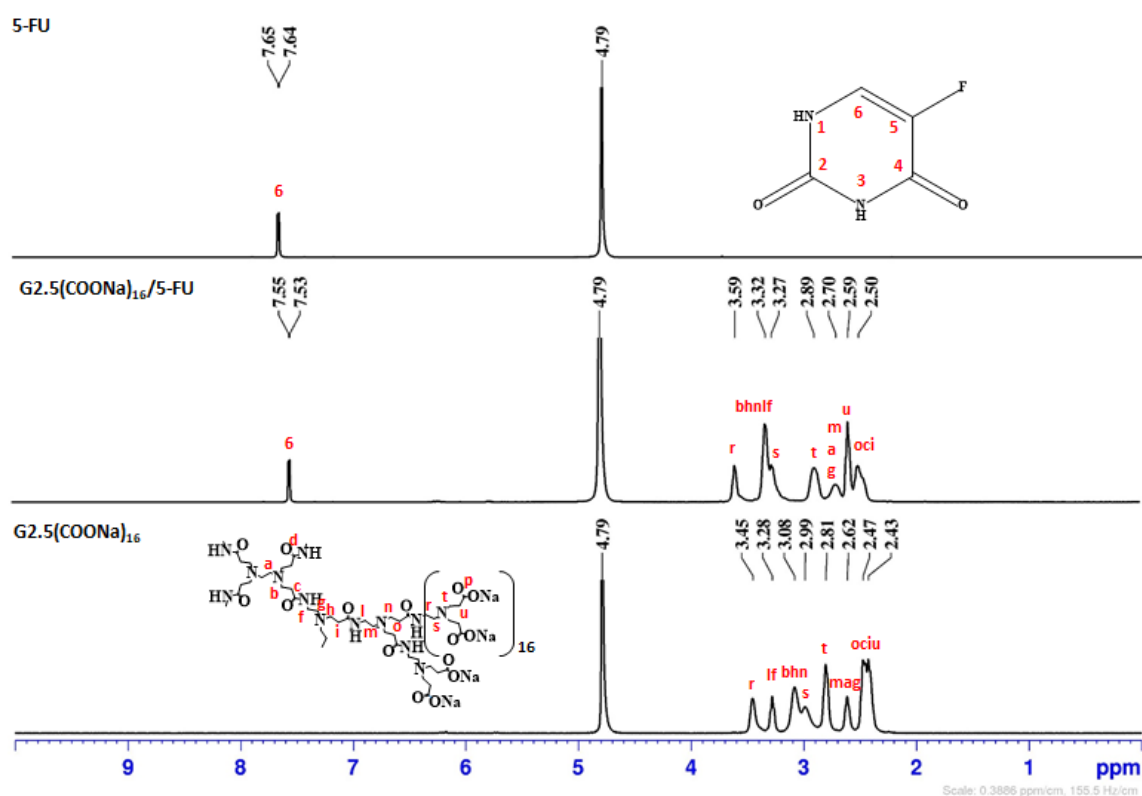

**Figure S31:**  $^1\text{H}$ -NMR of  $\text{G2.5(COONa)}_{32}$ ,  $\text{G2.5(COONa)}_{32}/5\text{-FU}$  and 5-FU in  $\text{D}_2\text{O}$ .

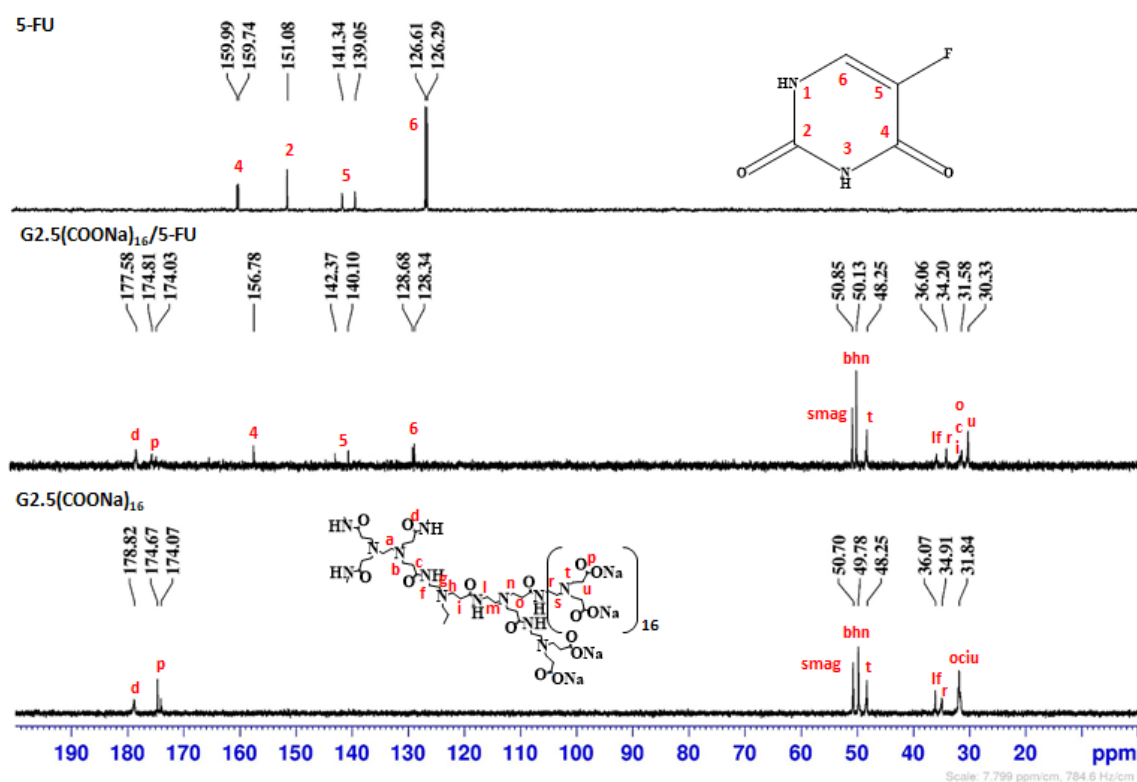

**Figure S32:** <sup>13</sup>C-NMR of G2.5(COONa)<sub>32</sub>, G2.5(COONa)<sub>32</sub>/5-FU and 5-FU in D<sub>2</sub>O.

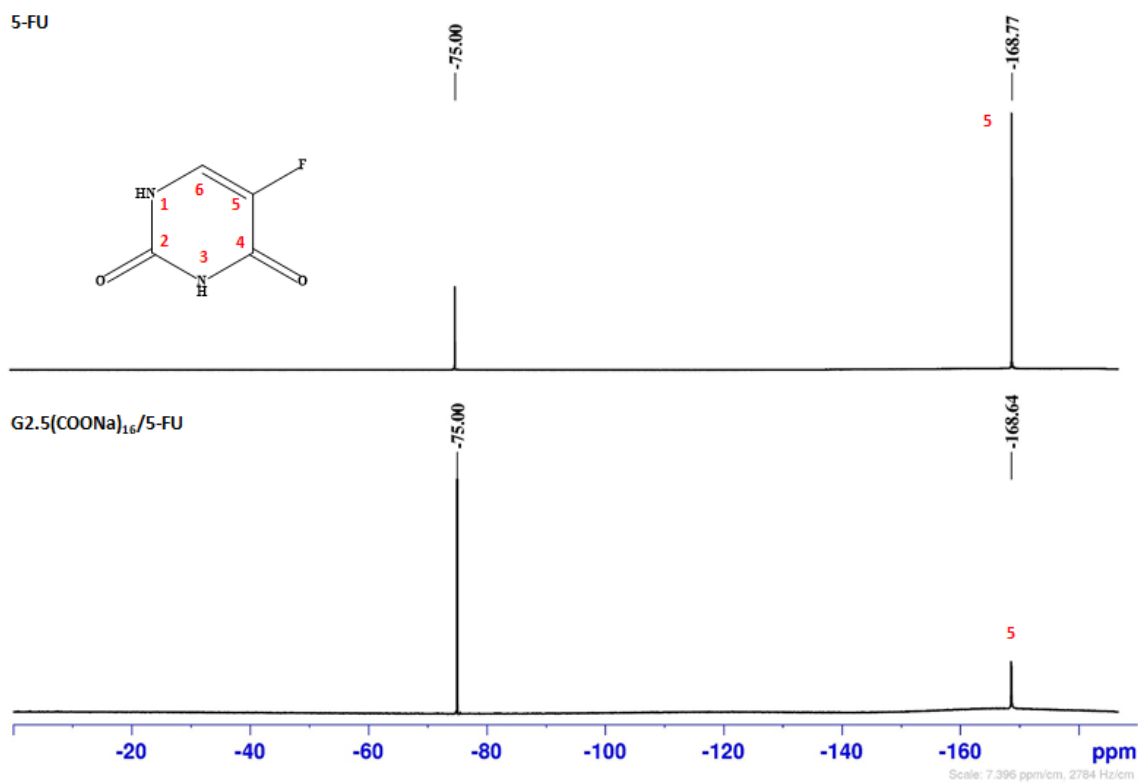

**Figure S33:**  $^{19}\text{F}$ -NMR of  $\text{G2.5(COONa)}_{32}/5\text{-FU}$  and 5-FU in  $\text{D}_2\text{O}$ .

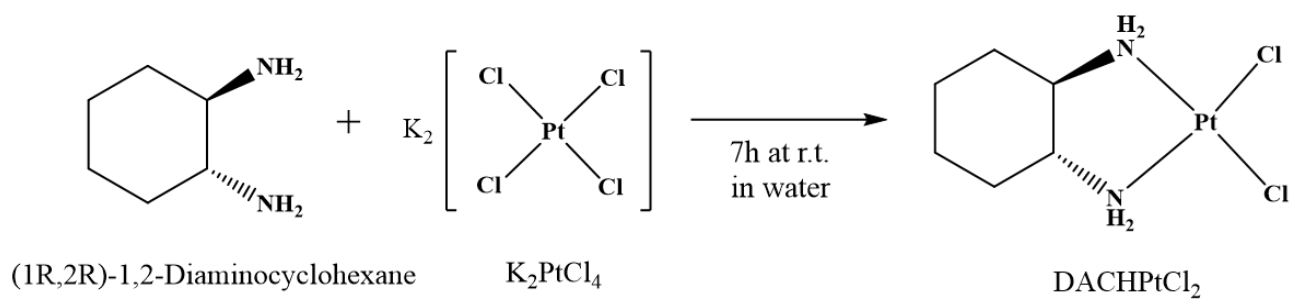

**Scheme S1:** Synthesis of  $\text{DACHPtCl}_2$  compound.

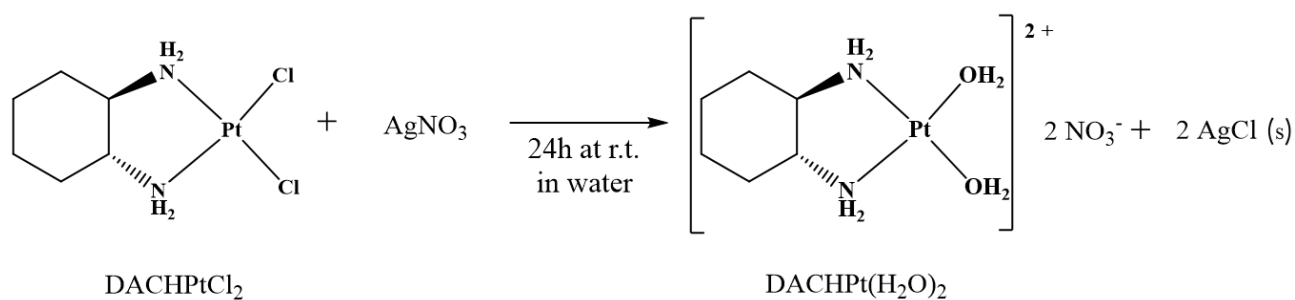

**Scheme S2:** Synthesis of DACHPt(H<sub>2</sub>O)<sub>2</sub> compound.

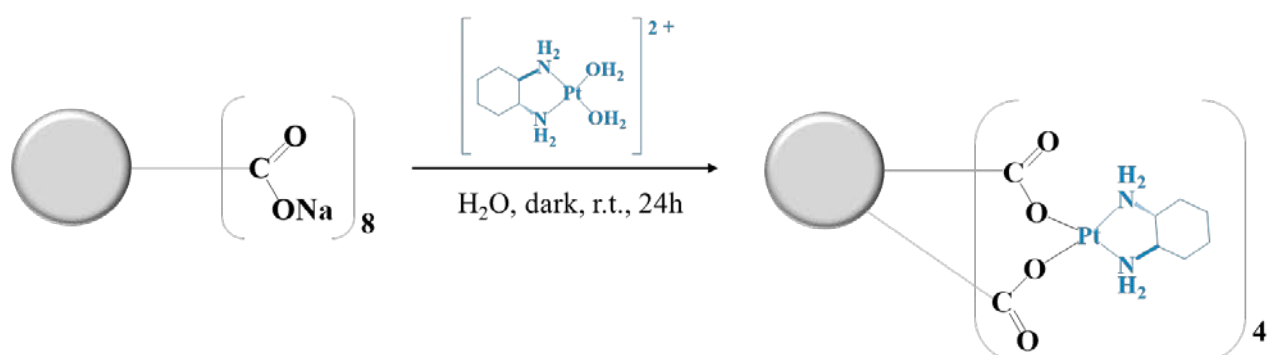

**Scheme S3:** Representation of the synthesis of anionic PAMAM dendrimer G0.5 with DACHPt(H<sub>2</sub>O)<sub>2</sub> complex, G0.5COO(DACHPt)<sub>4</sub>.

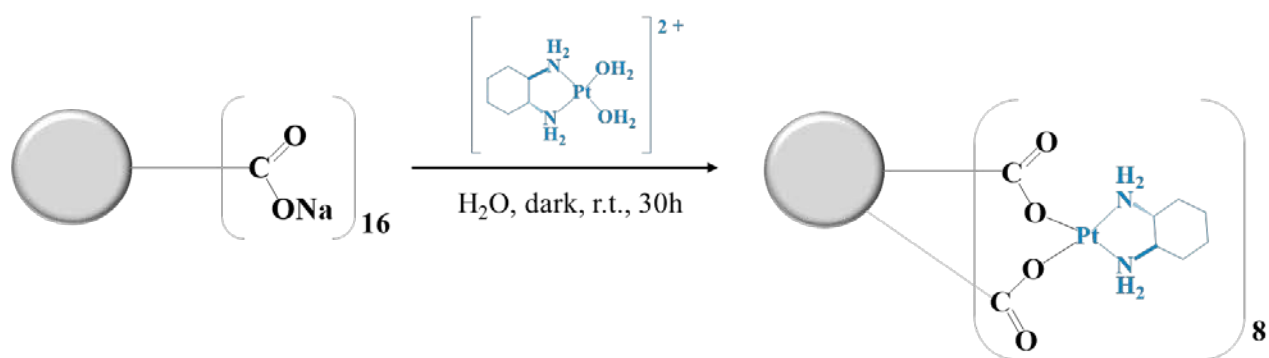

**Scheme S4:** Representation of the synthesis of anionic PAMAM dendrimer G1.5 with DACHPt(H<sub>2</sub>O)<sub>2</sub> complex, G1.5COO(DACHPt)<sub>8</sub>.



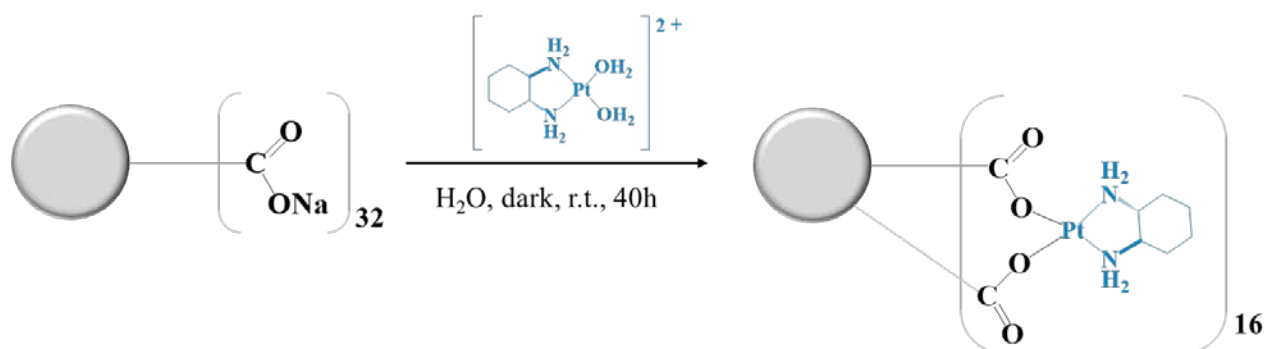

**Scheme S5:** Representation of the synthesis of anionic PAMAM dendrimer G2.5 with DACHPt(H<sub>2</sub>O)<sub>2</sub> complex, G2.5COO(DACHPt)<sub>16</sub>.

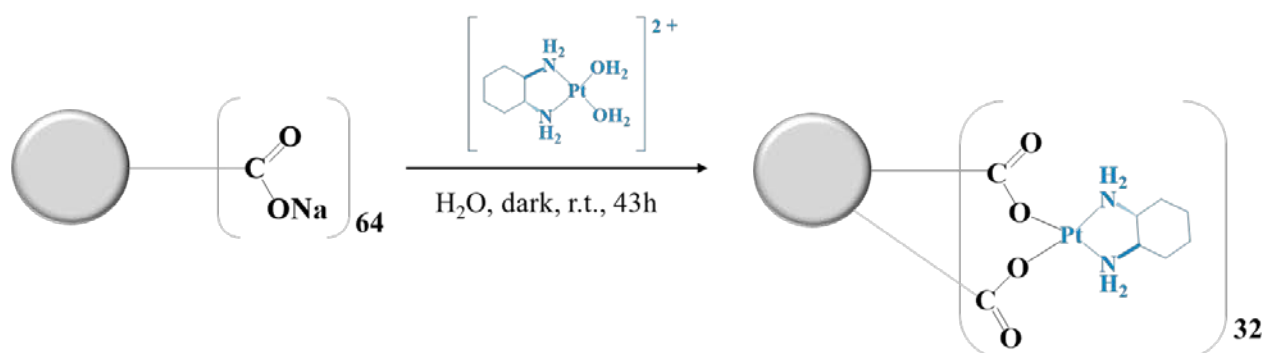

**Scheme S6:** Representation of the synthesis of anionic PAMAM dendrimer G2.5 with DACHPt(H<sub>2</sub>O)<sub>2</sub> complex, G3.5COO(DACHPt)<sub>32</sub>.

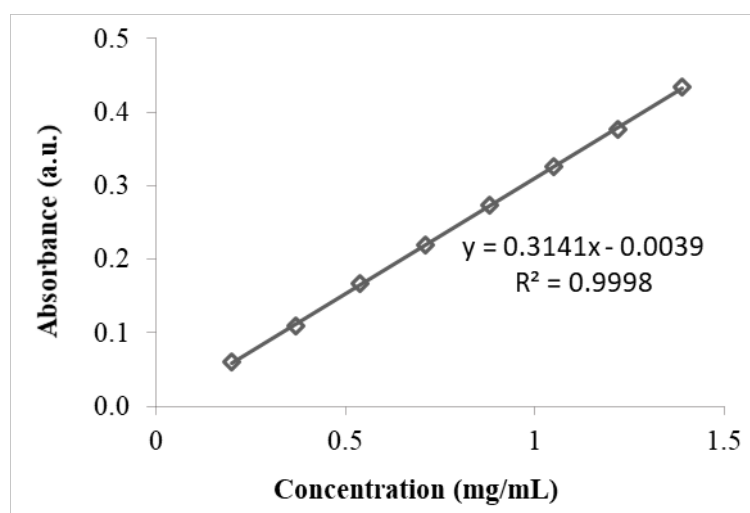

**Figure S34:** Standard curve of Hg using several dilutions: 0.2; 0.37; 0.54; 0.71; 0.88; 1.05; 1.22 and 1.39mg/mL. The absorbance was measured at 550nm.

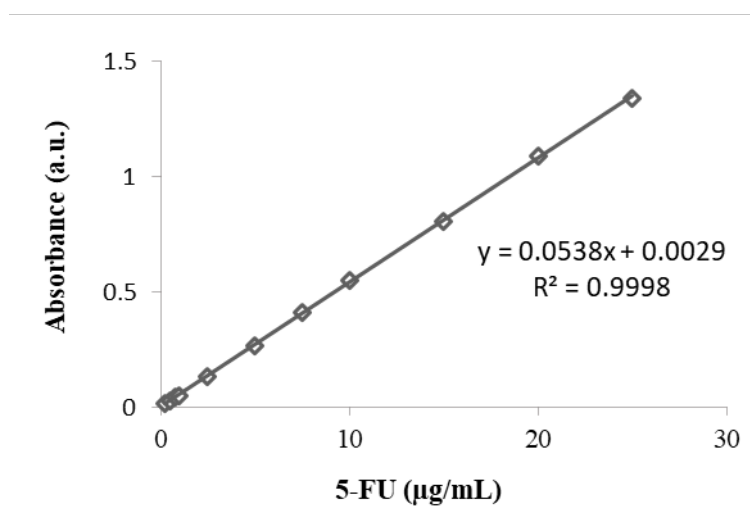

**Figure S35:** Standard curve of 5-Fluorouracil in ultrapure water using different concentrations: 0.25, 0.5, 0.75, 1, 2.5, 5, 7.5, 10, 15, 20 and 25 µg/mL. The absorbance was measured at 266nm.

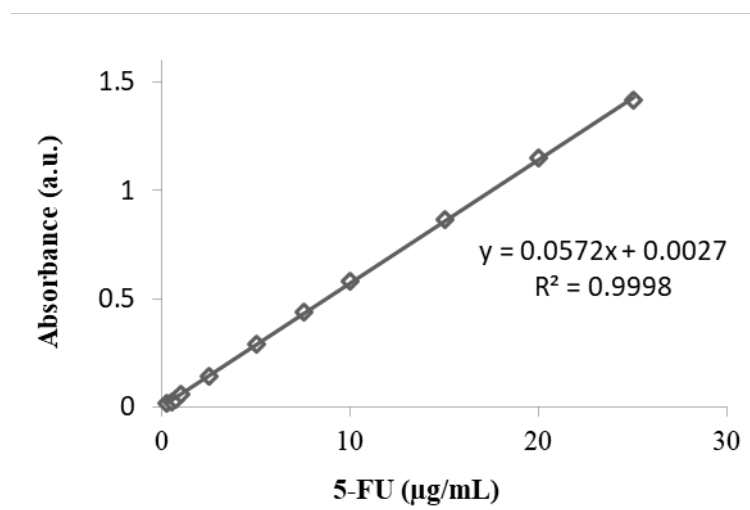

**Figure S36:** Standard curve of 5-Fluorouracil in PBS 5 using different concentrations: 0.25, 0.5, 0.75, 1, 2.5, 5, 7.5, 10, 15, 20 and 25 µg/mL. The absorbance was measured at 266nm.

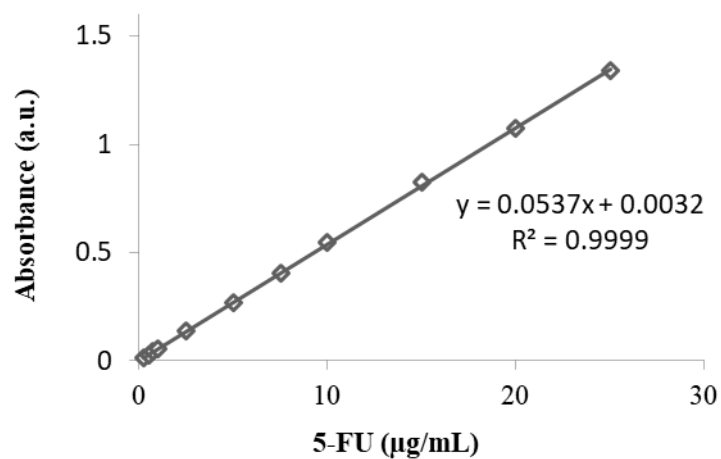

**Figure S37:** Standard curve of 5-Fluorouracil in PBS 7.4 using different concentrations: 0.25, 0.5, 0.75, 1, 2.5, 5, 7.5, 10, 15, 20 and 25 μg/mL. The absorbance was measured at 266nm.

## References

- [1] J.R.L. Priqueler, I.S. Butler, F.D. Rochon, An overview of  $^{195}\text{Pt}$  nuclear magnetic resonance spectroscopy, *Appl. Spectrosc. Rev.* 41 (2006) 185–226. <https://doi.org/10.1080/05704920600620311>.
